1 **Title:** Atrial fibrillation is associated with decreased claudin-5 in cardiomyocyte

2 **Authors:** Baihe Chen<sup>1#</sup>, Haiqiong Liu<sup>2#</sup>, Miao Wang<sup>3#</sup>, Xianbao Wang<sup>4</sup>, Yuanzhou Wu<sup>5</sup>,

3 Masafumi Kitakaze<sup>6</sup>, Jin Kyung Kim<sup>7</sup>, Yiyang Wang<sup>3\*</sup>, Tao Luo<sup>1,2,8\*</sup>

4 <sup>1</sup>Department of Functional Laboratory, Zhuhai Campus of Zunyi Medical University, Zhuhai,  
5 China

6 <sup>2</sup> Department of Health Management, Zhujiang Hospital, Southern Medical University,  
7 Guangzhou, China

8 <sup>3</sup>Department of Pathophysiology, Jinan University, Guangzhou, China

9 <sup>4</sup>Department of Cardiology, Zhujiang Hospital, Southern Medical University, Guangzhou, China

10 <sup>5</sup>Department of Cardiovascular Surgery, Zhujiang Hospital, Southern Medical University,  
11 Guangzhou, China

12 <sup>6</sup>Hanwa Memorial Hospital, Osaka, Japan

13 <sup>7</sup>Division of Cardiology, Department of Medicine, School of Medicine, University of California  
14 Irvine, United States of America

15 <sup>8</sup>Department of Pathophysiology, Zhuhai Campus of Zunyi Medical University, Zhuhai, China

16 **#Authors contributed equally to this work**

17 **\* Corresponding Author:** Yiyang Wang

18 **Corresponding address:** Department of Pathophysiology, Jinan University, Guangzhou, 510632,  
19 China

20 **Email:** wangyiyang@jnu.edu.cn

21 **Phone:** 0086-020-85220253

22 **\* Corresponding Author:** Tao Luo

23 **Corresponding address:** Department of Pathophysiology, Zhuhai Campus of Zunyi Medical  
24 University, Zhuhai, 519041, China

25 **Email:** luotao36126619@icloud.com

26 **Phone:** 0086-0756-7623202

27 **Short title:** Atrial fibrillation and claudin-5

## 28 **Clinical Perspective**

### 29 **What Is New?**

- 30 1. This is the first study to find the decreased expression of claudin-5 (Cldn5) with prominent  
31 muscle atrophy in the left atrial appendage of atrial fibrillation (AF) patients.
- 32 2. Knockdown of Cldn5 in the left ventricle via shRNA adeno-associated virus (AAV) infection  
33 caused myocardial atrophy and arrhythmia including ST elevation, replacement of P-waves  
34 with f-waves, and absence of P-waves prior to QRS.
- 35 3. The protein levels of CACNA2D2, CACNB2, MYL2 and MAP6 were significantly  
36 downregulated after Cldn5 deficiency.

### 37 **What Are the Clinical Implications?**

38 The present findings may improve our understanding of the role of Cldn5 in the  
39 pathophysiology of AF and provide a new therapeutic target for preventing AF.

### 40 **Nonstandard Abbreviations and Acronyms**

41 AF: atrial fibrillation; Cldn5: claudin-5; TEM: transmission electron microscope; AAV: adeno-  
42 associated virus; LVAWd: LV anterior wall diameter at diastole; CACNA2D2: calcium channel,  
43 voltage-dependent, alpha 2/delta subunit 2; CACNB2: calcium channel, voltage-dependent, beta  
44 2 subunit; MYL2: Myosin light chain 2; MAP6: Microtubule-associated protein 6; MMP:  
45 mitochondrial membrane potential; TJP1: tight junction protein 1; CAR: coxsackievirus-  
46 adenovirus receptor; TMT: tandem mass tagging

47

48 **Background:** Although it is critically important to understand the underlying molecular and  
49 electrophysiological changes that predispose to the induction and maintenance of  
50 atrial fibrillation (AF), the underlying mechanism of AF is still poorly defined. AF is  
51 characterized as the electrophysiological and membrane integrity abnormality of the atrial  
52 cells, and claudin-5 (Cldn5), a tight junction protein, may be involved in the pathophysiology of  
53 AF, however, the role of Cldn5 in AF is unknown.

54 **Methods:** Left atrial appendages from the enlarged left atrium were obtained from AF patients  
55 undergoing modified radiofrequency ablation maze procedure and normal left atrial appendages  
56 were obtained from non-AF donors. Western blot, immunofluorescence, transmission electron  
57 microscope (TEM), and proteomics analysis were performed to screen the specific protein  
58 expression and signal pathway changes in AF heart tissue vs. non-AF heart tissue. In addition,  
59 Cldn5 shRNA or siRNA adeno-associated virus (AAV) were then injected into the mouse left  
60 ventricle or added into HL1 cells respectively to knockdown claudin-5 in cardiomyocytes to  
61 observe whether the change of Cldn5 influences electrophysiology and affects those protein  
62 expressions stem from the proteomic analysis. Mitochondrial density and membrane potential  
63 were also measured by Mito tracker staining and JC-1 staining under the confocal microscope *in*  
64 *vitro*.

65 **Results:** The protein level of claudin-5 was significantly decreased in cardiomyocytes from the  
66 left atrium of AF patients compared to non-AF donors. Proteomics analysis showed that 83  
67 proteins were downregulated and 102 proteins were upregulated in the left atrial appendage of  
68 AF patients. Among them, CACNA2D2, CACNB2, MYL2 and MAP6 were dramatically  
69 downregulated. KEGG pathway analysis showed these changes would lead to hypertrophic  
70 and/or dilated cardiomyopathy. Cldn5 shRNA AAV infection induced-Cldn5 deficiency caused  
71 severe cardiac atrophy and arrhythmias in mice. The decreases in both mitochondrial numbers  
72 and mitochondrial membrane potential (MMP) were also observed *in vitro* after Cldn5  
73 knockdown by siRNA. Finally, western blot analysis confirmed the protein level of CACNA2D2,  
74 CACNB2, MYL2 and MAP6 were downregulated after Cldn5 knockdown *in vivo* and *in vitro*.

75 **Conclusions:** We demonstrated for the first time the deficiency of Cldn5 in cardiomyocytes in  
76 the left atrium of AF patients. The mechanism of AF might be associated with Cldn5 deficiency-  
77 associated downregulation of CACNA2D2, CACNB2, MYL2 and MAP6, and mitochondrial  
78 dysfunction in cardiomyocytes.

79 **Key Words:** Atrial fibrillation; Claudin-5; Cardiac atrophy; Proteomics analysis; Mitochondrial  
80 dysfunction

## 81 **Introduction**

82 Atrial fibrillation (AF) is the most common arrhythmia encountered in clinics.<sup>1</sup>  
83 Disorganization of electrical impulses in the heart causes a rapid and irregular heart rhythm and  
84 thus AF, which leads to substantial morbidity, mortality, and socioeconomic burden worldwide.<sup>2</sup>  
85 <sup>3</sup> Pathogenic mutations of numerous genes have been causally linked to AF, of which the  
86 majority encode ion channels, cardiac structural proteins, and gap junction channels.<sup>4,5</sup> Gap and  
87 tight junctions are the major intercellular junctions that play important roles in cellular  
88 communication and structural integrity. In the heart, gap junctions comprised of connexins (Cxs)  
89 form intercellular conduits responsible for electrical coupling and rapid coordinated action  
90 potential propagation between adjacent cardiomyocytes. Despite accumulating clinical evidence  
91 showing that gap junction protein Cx40 and Cx43 abnormalities are associated with AF,<sup>6-9</sup> there  
92 are few investigations for the effects of another cell-cell contact, tight junctions, on  
93 electrophysiological properties in human and murine hearts.

94 Claudin-5 (Cldn5) is a transmembrane tight junction protein that controls endothelial and  
95 epithelial permeabilities.<sup>10</sup> Numerous investigations about the role of Cldn5 have been focused  
96 on the blood-brain barrier in the last decades. Interestingly, clinical studies indicate that the level  
97 of Cldn5 is reduced in human failing hearts.<sup>11,12</sup> Our previous study demonstrated that Cldn5  
98 was expressed in human and murine cardiomyocytes and regulated mitochondrial dynamics by  
99 promoting mitochondrial fusion and inhibiting mitochondrial fission, which exerted its protective  
100 effect against ischemia insult.<sup>13</sup> However, the contribution of Cldn5 to cardiac electrophysiology  
101 remains poorly defined.

102 In the current study, we clinically investigated the association of Cldn5 expression with  
103 myocardial electrophysiological, morphological, and molecular characteristics in the left atrial  
104 appendages of AF patients. Using the Cldn5 shRNA AAV approach, the relationship between  
105 Cldn5 deficiency and cardiac electro-structural remodeling was evaluated in mouse heart. The  
106 proteomic study was used to assess the protein profile in human left atrial appendages, and  
107 western blot was used to confirm the changes of candidate proteins involved in myocardial

108 dilation and atrophy signaling pathways in AF patients' myocardium and in Cldn5 deficient  
109 murine hearts. Finally, cell culture was used to assess Cldn5 knockdown on the mitochondrial  
110 density and mitochondrial membrane potential by using Cldn5 siRNA in HL-1 cells. We show  
111 that Cldn5 is critical for maintaining normal cardiac morphology and electrophysiology, and  
112 downregulation of Cldn5 contributes to cardio-electric disturbance and myocyte atrophy as well  
113 as myocardial dilation, which may underly the pathogenesis of AF and lead to novel ways to  
114 treat arrhythmias in patients.

## 115 **Methods**

116 All procedures were performed in accordance with our institutional guidelines for animal  
117 research that conforms to the Guide for the Care and Use of Laboratory Animals, and this study  
118 was approved by the Ethical Committee of Zunyi Medical University, Zhuhai Campus. Mice  
119 were kept in standard housing conditions with a light/dark cycle of 12 h and free access to food  
120 and water.

### 121 **Human heart sample isolation**

122 With the approval from a local human research ethics review, left atrial appendages were  
123 obtained from patients with severe AF accompanied by rheumatic mitral valve diseases  
124 undergoing modified radiofrequency ablation maze procedure or normal control from organ  
125 donors that were not used for heart transplantation but had no history of AF and major  
126 cardiovascular diseases. Then the tissues were used for western blot, immunofluorescence, and  
127 proteomic analysis.

### 128 **Echocardiography and Electrocardiography**

129 The AF patients were diagnosed by electrocardiography, and echocardiography was adopted  
130 to observe the heart morphology. Cardiac function was evaluated in mice after 4 weeks of Cldn5  
131 shRNA AAV intramyocardial injection by echocardiography and electrocardiography. For  
132 echocardiography, using a Vivo-3300 ultrasonic system (VisualSonics, Toronto, ON, Canada)  
133 equipped with a 30 MHz high-resolution probe. Mice were anesthetized with inhalational  
134 isoflurane at a concentration of 1.5% and two-dimensional parasternal long-axis images of the  
135 left ventricle (LV) were obtained at the level of the papillary muscles. The LV anterior wall

136 diameter at diastole (LVAWd) was measured. For electrocardiography, mouse  
137 electrocardiography of Techman signal collection and analysis system (BL-420I) were used to  
138 track arrhythmias and ventricular premature beat (VPB).

### 139 **Adeno-associated virus (AAV)-mediated Cldn5 knockout**

140 C57BL/6 male mice (aged 8–12 weeks, weighing 20–25 g) were anesthetized with a mixture  
141 of xylazine (5 mg/kg, intraperitoneal) and ketamine (100 mg/kg, intraperitoneal). Cldn5 shRNA  
142 adeno-associated virus (AAV) was injected to the left ventricle by 3-5 points. All mice were  
143 under investigation for 4 weeks after Cldn5 shRNA injection to make sure the Cldn5 gene in the  
144 myocardium have been successfully knockdown.

### 145 **Tandem mass tagging proteomics analysis**

146 The primary experimental procedures for tandem mass tagging (TMT) proteomics analysis  
147 include whole-proteome preparation, trypsin digestion, TMT labeling, high-performance  
148 pressure liquid chromatography fractionation, LC- MS/MS analysis and data analysis. Raw data  
149 were analyzed using GO Annotation (<http://www.ebi.ac.uk/GOA/>), Domain Annotation  
150 (InterProScan) and KEGG Pathway Annotation (KEGG online service tools KAAS mapper).  
151 The protein-protein interaction networks stemming from a computational prediction were  
152 analyzed in STRING (<https://string-db.org/>).

153 The resulting MS/MS data were processed using Proteome Discoverer search engine  
154 (V2.4.1.15) against Homo\_Sapiens\_9606\_PR\_20210721.fasta (78,120 sequences) concatenated  
155 with reverse decoy database. The parameters were set as follows: (1) trypsin (full) was specified  
156 as the cleavage enzyme; (2) two missed cleavages were allowed; (3) the minimum peptide length  
157 was six amino acids; (4) the maximum number of modifications per peptide was 3; (5) the mass  
158 tolerance for precursor ions was 10 ppm in the first search; (6) fragment ion mass tolerance was  
159 0.02 Da; (7) Carbamidomethylation on cysteine was fixed modification; (8) oxidation on  
160 methionine and N-terminal acetylation were variable modification; and (9) false discovery rate  
161 was adjusted to 1%. Student's t-test was used to evaluate the significant differences. The proteins  
162 with a fold change of  $\geq 1.50$  or  $\leq 1/1.5$  and p-value  $< 0.05$  were considered differentially  
163 expressed proteins (DEPs).

## 164 **Immunofluorescence and Wheat Germ Agglutinin (WGA) staining**

165 Cldn5 was localized by double-label immunofluorescence confocal microscopy, and their  
166 overlap was quantified. Briefly, the human and mice heart tissues were fixed in 4%  
167 paraformaldehyde, embedded in paraffin, and sections (3–5 $\mu$ m thickness) were stained with  
168 primary antibodies for Cldn5-Alexa Fluor 488 (Invitrogen, Catalog#352588), CD31 (Proteintech,  
169 Catalog#11265-1-AP) or Tomm20 (Abcam, ab186734) for 1h at room temperature. Then  
170 Fluorescein donkey anti-rabbit IgG Alexa Fluor 594 was incubated for 30 min in the dark before  
171 confocal microscopic observation. In addition, the cross-sectional areas of the cardiomyocytes in  
172 human and mouse myocardium were observed by fluorescein-conjugated wheat germ agglutinin  
173 (WGA; 5  $\mu$ g/mL, 25530, AAT Bioquest, USA) staining and evaluated by calculating the single  
174 myocyte cross-sectional areas measured by ImageJ software (National Institutes of Health, USA).

## 175 **Cell culture, mitochondrial number and mitochondrial membrane potential ( $\Delta\psi$ m) analysis**

176 Mouse Cldn5 siRNA (RiboBio, siG2302130920115720) was transfected by lipo 2000 to  
177 knock down the expression of Cldn5 in HL-1 cells. Then the mitochondria were imaged by  
178 Mitotracker Green FM (Invitrogen, M7514) and the mitochondrial membrane potential was  
179 examined by a JC-1 staining kit (Beyotime, C2006). The intensity of the fluorescence was  
180 measured by Image J.

## 181 **Western Blot Analysis**

182 Proteins were obtained from whole hearts or HL-1 cells. Samples containing equal amounts of  
183 protein (10  $\mu$ g) were separated by 10% SDS-PAGE and transferred onto PVDF membranes. The  
184 membranes were blocked with 5% skimmed milk at room temperature for 2 h and then incubated  
185 overnight at 4°C with the primary antibody. The following antibodies were used for the Western  
186 blotting analysis: Cldn5 (Abcam, ab172968), CACNA2D2 (Abcam, ab173293), CACNB2  
187 (Abcam, ab253193), MYL2 (Affinity, DF7911), MAP6 (Santa Cruz, sc-137036). After being  
188 incubated with goat anti-rabbit or goat anti-mouse secondary antibody for 1 h at room  
189 temperature, the blots were detected and quantified by densitometry using the Image J Analysis  
190 software.

## 191 **Transmission Electron Microscopy**

192 Human and mouse heart samples were fixed in 2% glutaraldehyde, phosphate-buffered to pH  
193 7.4 and post-fixed with 1% OsO<sub>4</sub>. After dehydration, the samples were incubated in propylene  
194 oxide followed by embedding in a mixture of Epon 812 and Araldite. Ultrathin sections obtained  
195 by an Em UC7 Ultramicrotome (Leica) were collected on TEM nickel grids and analyzed using a  
196 TEM (JEM-1400 Plus, JEOL) at 100 kV.

## 197 **Statistical analysis**

198 All experiments were expressed as the mean  $\pm$  SEM and  $p < 0.05$  was considered to indicate  
199 statistical significance. The paired *t*-test was used for comparisons between the two groups. One-  
200 way ANOVA with post hoc analysis by the Fisher exact probability test was employed for  
201 multiple comparisons. All analyses were performed using SPSS 13.0 software (SPSS Inc.,  
202 Chicago, IL).

## 203 **Results**

### 204 **Claudin-5 is downregulated in cardiomyocytes from Af patients' left atrial appendages**

205 Diagnosis of AF is confirmed by a 12-lead electrocardiogram (ECG) and an  
206 echocardiographic observation in an apical four-chamber view. The representative images of  
207 ECG and echocardiography were presented in Figure 1A in an AF patient. A significantly  
208 enlarged left atrium (LA) was observed (red dashed box in Figure 1A). To mitigate the risk of  
209 stroke, we adopted a modified radiofrequency ablation maze procedure to ablate AF triggers and  
210 modify AF substrates (Figure 1B, right panel), which is proven more efficient than the catheter-  
211 based introduction of lesions (Figure 1B, left panel). The excised LA appendages were then used  
212 for western blot and immunofluorescence (IF) to observe the Cldn5 expression and  
213 cardiomyocyte morphology. The protein level of Cldn5 was significantly decreased in the AF  
214 group (Figure 1C). The IF images further showed the localization of Cldn5 on mitochondria and  
215 confirmed the decreased expression of Cldn5 in cardiomyocytes (Figures 1D and 1E). Left atrial  
216 appendage sections stained with FITC-WGA also showed the decreased cross-section of  
217 cardiomyocytes in the AF group when compared with non-AF.

### 218 **Claudin-5 knockdown causes cardiac atrophy and disrupts cardiac rhythm in mice**



219 In-vivo studies in C57BL6 mice were performed to evaluate the influence of cardiac Cldn5 on  
220 cardiac morphology and electrophysiology. Cldn5 shRNA AAV was injected in the murine left  
221 ventricular myocardium for 4 weeks to knock down the Cldn5 as shown in Figure 2A. Western  
222 blot showed AAV infection caused a 69.5% reduction of Cldn5 in the LV (Figures 2B and 2C).  
223 The thickness of the LV anterior wall was also reduced by 45% in the shRNA AAV infection  
224 group (Figures 2D and 2E). Cardiac conduction was assessed by II-lead ECG specialized for  
225 murine, which detected the arrhythmia including ST elevation, replacement of P-waves with F-  
226 waves and absence of P-waves prior to QRS (Figure 2F). Additionally, LV sections stained with  
227 FITC-WGA showed a decreased cross-section of cardiomyocytes in the shRNA infection group  
228 compared to the control (Figures 2G and 2H).

### 229 **Overview of tandem mass tag-based proteomic data**

230 Cardiac tissues from AF and non-AF patients' left atrial appendages were undertaken  
231 proteomic analysis. By strict quality control, we obtained a total of 6,36,881 spectrums (3,05,015  
232 matched), and 50,211 peptides (45,784 unique peptides) were detected among them. Finally,  
233 5,648 proteins were identified, 5,365 of which were quantified (Figure 3A). Biological replicates  
234 were validated by the relative standard deviation distribution, which displayed the precision and  
235 reproducibility of our proteomic datasets (Figure 3B). Following statistical analysis, 185 proteins  
236 with fold-change  $\geq 1.50$  or  $\leq 1/1.5$  and  $p$ -value  $< 0.05$  were considered the DEPs. Among them, a  
237 total of 102 up-regulated and 83 down-regulated DEPs were identified when comparing AF with  
238 non-AF patients' heart samples (Figure 3C). These data were clustered on a heatmap to reveal  
239 hierarchical commonality in protein abundance for samples within each cardiac tissue type, yet  
240 differences in protein abundance when comparing AF and non-AF heart tissues (Figure 3D).  
241 Further analysis showed that the sizes of most proteins were distributed in the range of 10 to  
242 200kDa, which meant reliable results (Figure 3E).

### 243 **The cardiac hypertrophy signaling pathway is negatively regulated in AF patients' left** 244 **atrium**

245 To confirm the KEGG enrichment analysis, we found the role of DEPs on several signaling  
246 pathways especially cardiovascular disease signaling (Figure 4A). We extracted the information  
247 solely about cardiovascular disease signaling and found 6 specific cardiovascular signaling

248 pathways, including cardiac hypertrophy signaling (Enhanced), the role of NFAT in cardiac  
249 hypertrophy, endothelin-1 signaling, thrombin signaling, HIF1 $\alpha$  signaling and Cardiac  
250 hypertrophy signaling were negatively regulated by the changed proteins (Figure 4B). Among  
251 them, CACNA2D2, CACNB2 and MYL2 were get involved (Figure 4C).

### 252 **Hypertrophic and dilated cardiomyopathy KEGG pathways were identified in the AF** 253 **patients' cardiomyocyte**

254 To predict the possible roles of DEPs, the INGENUITY pathway analysis was conducted. As  
255 shown in Figure 5A, 21 types of cardiovascular diseases were linked to DEPs when compared  
256 AF with non-AF atrial tissues. The predictive  $p$ -value was far away less than 0.05. Among them,  
257 abnormal morphology of the heart was associated with 20 changed proteins, abnormality of the  
258 heart ventricle was connected with 13 changed proteins and hypertrophic cardiomyopathy was  
259 related to 7 changed proteins. The enlarged left atrium was the outcome of mitral stenosis or  
260 mitral regurgitation from concentric hypertrophy to eccentric hypertrophy in the development of  
261 cardiac remodeling of rheumatic valvular heart disease (Figure 5B). A volcano plot showed the  
262 decreased CACNA2D2, CACNB2, MYL2 and MAP6 are highly involved in the development of  
263 these three morphological changes of the heart (Figure 5C). Further, KEGG enrichment analysis  
264 indicated that these four down-regulated proteins were mainly enriched in the following two  
265 pathways: calcium transport and myofibril assembly in cardiomyocytes (Figures 5D and 5E).

### 266 **Impact of Cldn5 knockdown on dilated cardiomyopathy pathway *in vivo***

267 The decreased expression of the targeted four DEPs mentioned above in AF patients'  
268 cardiomyocytes was further confirmed by western blot (Figure 6A). Immuno-electron  
269 microscopy for Cldn5 showed the morphology of mitochondria collapsed with decreased  
270 immunogold-Cldn5 on them (Figure 6B). Similar results were verified in an in-vitro study where  
271 Cldn5 was knocked down by shRNA AAV infection for 4 weeks in murine LV. Western blot  
272 showed down-regulated protein levels of CACNA2D2, CACNB2, MYL2 and MAP6 after the  
273 expression of Cldn5 was disturbed (Figure 6C). The disruption of mitochondrial morphology and  
274 distribution as well as depletion of mitochondria were also observed in Cldn5 shRNA AAV-  
275 infected myocardium (Figure 6D).

276 **Cldn5 knockdown decreases the mitochondrial density and mitochondrial membrane**  
277 **potential *in vitro***

278 In vitro studies were conducted in HL-1 cells to assess the influence of Cldn5 on the protein  
279 levels of CACNA2D2, CACNB2, MYL2 and MAP6 and observe the role of Cldn5 on  
280 mitochondrial membrane potential. The four targeted proteins were all down-regulated by si-  
281 Cldn5 transfection for 48 hours in the culture medium (Figures 7A and 7B). Decreased number  
282 of mitochondria was also observed by Mitotracker staining under confocal microscopy (Figures  
283 7C and 7D). We further detected significantly enhanced fluorescence of JC-1 monomers (green  
284 color) after Cldn5 knockdown, which indicated mitochondrial membrane potential was  
285 decreased (Figures 7E and 7F).

286 **Discussion**

287 Major findings.

288 Our study firstly demonstrates that reduced expression of Cldn5 in cardiac tissue along with  
289 decreased CACNA2D2, CACNB2, MYL2 and MAP6 might induce disturbance of myofibrils  
290 and microtubules as well as dysfunction of calcium transport, which leads to myocardial  
291 excitation-contraction coupling disorder followed by atrial atrophy, dilation and AF. These  
292 findings summarized in Fig. 8 broaden our comprehension of the effect of cell-cell adhesion on  
293 arrhythmia.

294 Connexins and AF

295 The pathogenesis of AF is linked to gap junction remodeling of atrial tissue. Gap junctions are  
296 communication structures while tight junctions serve the major functional purpose of providing a  
297 “barrier” within the endothelial and epithelial membrane.<sup>14</sup> Normal cardiac conduction requires  
298 gap junction proteins like Cx30, Cx40, Cx43 and Cx45. Since they provide the syncytial  
299 properties of the atrium and ventricle, changes in their expression and distribution may lead to  
300 arrhythmias. For instance, Cx30 deficient mice had a faster mean daily heart rate than control  
301 mice.<sup>15</sup> Cx30.2 deficient mice also had shorter PQ intervals, elevated AV-nodal conduction  
302 velocity and faster ventricular response rates compared to WT littermates.<sup>16</sup> Cx40 and Cx43  
303 downregulation in the atrium and ventricle of the rabbit’s hearts, respectively, have been thought

304 to enhance the susceptibility to atrial and ventricular tachycardia or fibrillation,<sup>17, 18</sup> and the  
305 heavy ion beam is reportedly promising in the treatment of arrhythmia by increasing the  
306 expression of Cx40/43 in animal models.<sup>19</sup> Additionally, clinical studies also confirmed severely  
307 decreased Cx40 levels and reduced overlap with Cx43 in AF patients' atria.<sup>7</sup> These lines of  
308 evidence have demonstrated the critical role of Cxs in controlling the cardiac rhythm and cardiac  
309 conduction, however, the function of the tight junction channel in the pathogenesis of AF is still  
310 largely undefined.

### 311 Mechanisms of the causes of Cldn5 deficiency and AF

312 Cardiomyocyte's rod-shaped cell morphology is stabilized through specific and direct  
313 interaction via the intercalated disk localized at the bipolar ends of the cardiomyocyte, while the  
314 lateral cell surface is believed to interact with the extracellular matrix through receptors on the  
315 costamere without physical contacts between proximate cardiomyocytes. Cldn5 is found  
316 localized in the lateral membranes of cardiomyocytes and is decreased in a mouse model of  
317 muscular dystrophy with cardiomyopathy.<sup>20</sup> Our previous study further found Cldn5 was  
318 localized in both sarcolemma and mitochondria of cardiomyocytes and acted as a mitochondrial  
319 dynamic regulator preventing mitochondrial fission and preventing the heart from ischemic  
320 insult.<sup>13</sup> However, the electrophysiological role of Cldn5 was still not fully investigated though  
321 there was evidence linking tight junction protein to disturbed cardiac rhythm. It has been  
322 reported that tight junction protein 1 (TJP1) cardiac-specific deletion transgenic mice developed  
323 AV block along with decreased Cx40 expression and intercalated disc localization.<sup>21</sup> Another  
324 study showed that tight junction protein, coxsackievirus-adenovirus receptor (CAR), and heart-  
325 specific inducible knockout impaired electrical conduction between the atrium and ventricle in  
326 mice.<sup>22</sup> In the present study, we hypothesized the decreased protein level of Cldn5 in AF patients  
327 left atrium was linked to AF, therefore we used Cldn5 shRNA AAV infection to knockdown  
328 cardiac Cldn5, and we found ST elevation, ventricular premature beat and AF in Cldn5 ventricle  
329 knockdown mice. We also found the expression of Cx40/43 was not changed in western blot  
330 after Cldn5 knock down (unpublished data). The implication of these novel findings is that  
331 myocardial tight junction protein, Cldn5, maybe also crucial in maintaining normal  
332 electrophysiology.

333 The mechanism underlying the pathogenesis of AF and the other cardiac rhythm disturbance  
334 in mice after *Cldn5* knockdown in the left ventricle might be different from that of reduced  
335 *Cldn5* in AF patients' left atrium though, we captured the common changes of molecules from  
336 western blot analysis which showed the protein levels of *CACNA2D2*, *CACNB2*, *MAP6* and  
337 *MYL2* were significantly downregulated. Actually, *CACNA2D2* serves in vivo as a component  
338 of a P/Q-type calcium channel, a functional auxiliary subunit of voltage-gated  $\text{Ca}^{2+}$  channels, and  
339 is indispensable for central nervous system function.<sup>23</sup> Evidence showed that inhibition or  
340 knockdown of *CACNA2D2* could induce arrhythmias in rat ischemic hearts.<sup>24</sup> Moreover, a loss-  
341 of-function mutation in another L-type calcium channel subunit gene *CACNB2* also has been  
342 reported to cause a short QT syndrome subtype.<sup>25</sup> A missense variant in *CACNB2* is also  
343 associated with ventricular fibrillation.<sup>26</sup> Therefore, the downregulated expression of  
344 *CACNA2D2* and *CACNB2* in AF patients' cardiomyocytes and in *Cldn5* knockdown murine  
345 cardiomyocytes in the present study suggest a novel role of *Cldn5* in modulating calcium  
346 transport via voltage-gated  $\text{Ca}^{2+}$  channels.

347 The reduction of protein level of *Cldn5* is observed in human heart samples from end-stage  
348 cardiomyopathy,<sup>11</sup> and *Cldn5* mRNA and protein levels are also specifically reduced in the heart  
349 from a mouse model of muscular dystrophy with cardiomyopathy induced by  
350 utrophin/dystrophin double knockout.<sup>20</sup> On the contrary, the over-expression of *Cldn5* via  
351 adeno-associated virus (AAV) in these double-knockout mice could prevent the development of  
352 cardiomyopathy and improve cardiac damage.<sup>27</sup> Although the connection between *Cldn5* and  
353 dystrophy in cardiomyopathy or muscular dystrophy is inconclusive, the relation between  
354 decreased *Cldn5* and cardiomyopathy is apparent. Here we show that significant cardiac myocyte  
355 atrophy is common in cardiomyocytes from AF patients' left atrial appendage and from mouse  
356 left ventricle after *Cldn5* knockdown. These observations are consistent with the data above  
357 suggesting the role of *Cldn5* in maintaining the cellular morphology of cardiomyocytes. The  
358 mechanism underlying this phenomenon might be associated with decreased *MAP6* and *MYL2*  
359 predicted by proteomic analysis and confirmed by western blot. Since the evidence showed that  
360 deletion of the *MAP6* resulted in skeletal muscle atrophy and weakness in mice,<sup>28</sup> and mutation  
361 in *MYL2* gene was identified in hypertrophic cardiomyopathy (HCM),<sup>29,30</sup> we believe that the  
362 deficiency of these two proteins after *Cldn5* depletion is associated with cardiac myocyte atrophy  
363 in the current study.

364 Furthermore, in our cellular study knockdown Cldn5 in HL-1 cells, we also observed similar  
365 results from the in vivo study. Mitochondrial dysfunction might be the key process underlying  
366 Cldn5 deficiency-induced arrhythmia since mitochondrial number and membrane potential were  
367 decreased after Cldn5 knockdown. These results were consistent with our previous observation  
368 that mitochondrial fission was enhanced in cardiomyocytes post hypoxia-reoxygenation when  
369 Cldn5 was knocked down by siRNA.<sup>13</sup> Furthermore, Cldn5 overexpression attenuated  
370 myocardial oxidative stress and mitochondrial dysfunction in mice subjected to myocardial  
371 ischemia reperfusion injury.<sup>31</sup> Together these findings suggest that mitochondrial dysfunction  
372 induced by the downregulation of Cldn5 along with the significant decrease of CACNA2D2,  
373 CACNB2, MAP6 and MYL2 contributed to calcium transport disturbance and myofibrils and  
374 microtubules disturbance, leading to myocardial excitation-contraction coupling disorder  
375 followed by cardiac myocyte atrophy and fibrillation (Figure 8).

#### 376 Study limitations

377 Although the expression of Cldn5 was decreased in the left atrial appendages in patients with  
378 AF, Cldn5 shRNA AAV was injected into the myocardium of the anterior left ventricle rather  
379 than the left atrium in this study, suggesting the uncertainty of the areas of Cldn5 expression of  
380 the role of AF. Secondly, due to the embryo-lethal, this was a study performed without a Cldn5  
381 gene knockout mouse. An inducible cardiomyocyte-specific Cldn5 deletion mouse (Cldn5<sup>fl/fl</sup>;  
382 Myh6<sup>Cre/Esr1\*</sup>) will be used in future studies. Moreover, the mechanisms by which Cldn5  
383 knockdown leads to the downregulation of CACNA2D2, CACNB2, MYL2 and MAP6 are not  
384 investigated. The interactions between Cldn5 and these four proteins should be considered due to  
385 the fact that in failing heart, Cldn5 in cardiomyocytes is reduced and Ephrin-B1 localization is  
386 altered,<sup>12</sup> which hinting that Cldn5 may be required for stabilizing the localization of the other  
387 receptors or proteins.

#### 388 Conclusions

389 This is the first clinical study to show the role of Cldn5 on cardiac rhythm and cardiac  
390 hypertrophy. The enlargement of LA in Af patients is accompanied by cardiac atrophy and  
391 decreased Cldn5 meanwhile cardiac Cldn5 deficiency leads to disturbance of cardiac rhythm and  
392 myocyte atrophy. Cell culture findings show decreased mitochondrial numbers and membrane

393 potential. Proteomic study and western blots results demonstrate the detrimental effect of Cldn5  
394 deficiency is associated with the downregulation of CACNA2D2, CACNB2, MYL2 and MAP6.  
395 These findings may be considered for the development of promising cardioprotective  
396 therapeutics based on claudin-5 to maintain healthy cardiac rhythm and morphology.

### 397 **Acknowledgments**

398 The authors thank Hangzhou Jingjie Biotechnology in Hangzhou, China, for support with  
399 proteomics procedures; Qiang Feng from Guangzhou Huayin Health Medical Group Co., Ltd.  
400 for excellent technical assistance for transmission electron microscope.

### 401 **Sources of Funding**

402 This work was supported by two grants from the National Natural Science Foundation of  
403 China (grant no. 82270283 and no. 82060045 to Dr. Tao Luo). A Funded Project from Zunyi  
404 Medical University (grant no. [2018]5772-025, to Dr. Tao Luo) and a grant from Guizhou  
405 province of China (grant no. [2021]224, to Dr. Tao Luo).

406

### 407 **Disclosures**

408 The authors have no conflicts of interest to disclose.

### 409 **Reference**

- 410 1. Bosch NA, Cimini J, Walkey AJ. Atrial fibrillation in the icu. *Chest*. 2018;154:1424-1434
- 411 2. Benjamin EJ, Muntner P, Alonso A, Bittencourt MS, Callaway CW, Carson AP, Chamberlain AM,  
412 Chang AR, Cheng S, Das SR, Delling FN, Djousse L, Elkind MSV, Ferguson JF, Fornage M, Jordan LC,  
413 Khan SS, Kissela BM, Knutson KL, Kwan TW, Lackland DT, Lewis TT, Lichtman JH, Longenecker CT,  
414 Loop MS, Lutsey PL, Martin SS, Matsushita K, Moran AE, Mussolino ME, O'Flaherty M, Pandey A,  
415 Perak AM, Rosamond WD, Roth GA, Sampson UKA, Satou GM, Schroeder EB, Shah SH, Spartano  
416 NL, Stokes A, Tirschwell DL, Tsao CW, Turakhia MP, VanWagner LB, Wilkins JT, Wong SS, Virani  
417 SS, American Heart Association Council on E, Prevention Statistics C, Stroke Statistics S. Heart  
418 disease and stroke statistics-2019 update: A report from the american heart association.  
419 *Circulation*. 2019;139:e56-e528
- 420 3. Wijesurendra RS, Casadei B. Mechanisms of atrial fibrillation. *Heart*. 2019;105:1860-1867
- 421 4. Andersen JH, Andreasen L, Olesen MS. Atrial fibrillation-a complex polygenetic disease.  
422 *European journal of human genetics : EJHG*. 2021;29:1051-1060

- 423 5. Guo YH, Yang YQ. Atrial fibrillation: Focus on myocardial connexins and gap junctions. *Biology*.  
424 2022;11
- 425 6. Polontchouk L, Haefliger JA, Ebelt B, Schaefer T, Stuhlmann D, Mehlhorn U, Kuhn-Regnier F, De  
426 Vivie ER, Dhein S. Effects of chronic atrial fibrillation on gap junction distribution in human and  
427 rat atria. *Journal of the American College of Cardiology*. 2001;38:883-891
- 428 7. Gemel J, Levy AE, Simon AR, Bennett KB, Ai X, Akhter S, Beyer EC. Connexin40 abnormalities and  
429 atrial fibrillation in the human heart. *Journal of molecular and cellular cardiology*. 2014;76:159-  
430 168
- 431 8. Patel D, Gemel J, Xu Q, Simon AR, Lin X, Matiukas A, Beyer EC, Veenstra RD. Atrial fibrillation-  
432 associated connexin40 mutants make hemichannels and synergistically form gap junction  
433 channels with novel properties. *FEBS letters*. 2014;588:1458-1464
- 434 9. Sun Y, Tong X, Chen H, Huang T, Shao Q, Huang W, Laird DW, Bai D. An atrial-fibrillation-linked  
435 connexin40 mutant is retained in the endoplasmic reticulum and impairs the function of atrial  
436 gap-junction channels. *Disease models & mechanisms*. 2014;7:561-569
- 437 10. Hashimoto Y, Campbell M, Tachibana K, Okada Y, Kondoh M. Claudin-5: A pharmacological  
438 target to modify the permeability of the blood-brain barrier. *Biological & pharmaceutical  
439 bulletin*. 2021;44:1380-1390
- 440 11. Mays TA, Binkley PF, Lesinski A, Doshi AA, Quaille MP, Margulies KB, Janssen PM, Rafael-Fortney  
441 JA. Claudin-5 levels are reduced in human end-stage cardiomyopathy. *Journal of molecular and  
442 cellular cardiology*. 2008;45:81-87
- 443 12. Swager SA, Delfin DA, Rastogi N, Wang H, Canan BD, Fedorov VV, Mohler PJ, Kilic A, Higgins RSD,  
444 Ziolo MT, Janssen PML, Rafael-Fortney JA. Claudin-5 levels are reduced from multiple cell types  
445 in human failing hearts and are associated with mislocalization of ephrin-b1. *Cardiovascular  
446 pathology : the official journal of the Society for Cardiovascular Pathology*. 2015;24:160-167
- 447 13. Luo T, Liu H, Chen B, Liu H, Abdel-Latif A, Kitakaze M, Wang X, Wu Y, Chou D, Kim JK. A novel role  
448 of claudin-5 in prevention of mitochondrial fission against ischemic/hypoxic stress in  
449 cardiomyocytes. *The Canadian journal of cardiology*. 2021;37:1593-1606
- 450 14. Bazzoni G, Dejana E. Endothelial cell-to-cell junctions: Molecular organization and role in  
451 vascular homeostasis. *Physiological reviews*. 2004;84:869-901
- 452 15. Gros D, Theveniau-Ruissy M, Bernard M, Calmels T, Kober F, Sohl G, Willecke K, Nargeot J,  
453 Jongasma HJ, Mangoni ME. Connexin 30 is expressed in the mouse sino-atrial node and  
454 modulates heart rate. *Cardiovascular research*. 2010;85:45-55
- 455 16. Kreuzberg MM, Schrickel JW, Ghanem A, Kim JS, Degen J, Janssen-Bienhold U, Lewalter T,  
456 Tiemann K, Willecke K. Connexin30.2 containing gap junction channels decelerate impulse  
457 propagation through the atrioventricular node. *Proceedings of the National Academy of Sciences  
458 of the United States of America*. 2006;103:5959-5964
- 459 17. Amino M, Yamazaki M, Yoshioka K, Kawabe N, Tanaka S, Shimokawa T, Niwa R, Tomii N, Kabuki S,  
460 Kunieda E, Yagishita A, Ikari Y, Kodama I. Heavy ion irradiation reduces vulnerability to atrial  
461 tachyarrhythmias - gap junction and sympathetic neural remodeling. *Circulation journal :  
462 official journal of the Japanese Circulation Society*. 2023;87:1016-1026
- 463 18. Amino M, Yoshioka K, Tanabe T, Tanaka E, Mori H, Furusawa Y, Zareba W, Yamazaki M,  
464 Nakagawa H, Honjo H, Yasui K, Kamiya K, Kodama I. Heavy ion radiation up-regulates cx43 and  
465 ameliorates arrhythmogenic substrates in hearts after myocardial infarction. *Cardiovascular  
466 research*. 2006;72:412-421
- 467 19. Amino M, Yoshioka K, Kamada T, Furusawa Y. The potential application of heavy ion beams in  
468 the treatment of arrhythmia: The role of radiation-induced modulation of connexin43 and the  
469 sympathetic nervous system. *International journal of particle therapy*. 2018;5:140-150



- 470 20. Sanford JL, Edwards JD, Mays TA, Gong B, Merriam AP, Rafael-Fortney JA. Claudin-5 localizes to  
471 the lateral membranes of cardiomyocytes and is altered in utrophin/dystrophin-deficient  
472 cardiomyopathic mice. *Journal of molecular and cellular cardiology*. 2005;38:323-332
- 473 21. Dai W, Nadadur RD, Brennan JA, Smith HL, Shen KM, Gadek M, Laforest B, Wang M, Gemel J, Li Y,  
474 Zhang J, Ziman BD, Yan J, Ai X, Beyer EC, Lakata EG, Kasthuri N, Efimov IR, Broman MT,  
475 Moskowitz IP, Shen L, Weber CR. Zo-1 regulates intercalated disc composition and  
476 atrioventricular node conduction. *Circulation research*. 2020;127:e28-e43
- 477 22. Lisewski U, Shi Y, Wrackmeyer U, Fischer R, Chen C, Schirdewan A, Juttner R, Rathjen F, Poller W,  
478 Radke MH, Gotthardt M. The tight junction protein claudin-5 regulates cardiac conduction and cell-cell  
479 communication. *The Journal of experimental medicine*. 2008;205:2369-2379
- 480 23. Ivanov SV, Ward JM, Tessarollo L, McAreavey D, Sachdev V, Fananapazir L, Banks MK, Morris N,  
481 Djurickovic D, Devor-Henneman DE, Wei MH, Alvord GW, Gao B, Richardson JA, Minna JD,  
482 Rogawski MA, Lerman MI. Cerebellar ataxia, seizures, premature death, and cardiac  
483 abnormalities in mice with targeted disruption of the *cacna2d2* gene. *The American journal of*  
484 *pathology*. 2004;165:1007-1018
- 485 24. Zhang J, Wu L, Li Z, Fu G. Mir-1231 exacerbates arrhythmia by targeting calcium channel gene  
486 *cacna2d2* in myocardial infarction. *American journal of translational research*. 2017;9:1822-1833
- 487 25. Zhong R, Zhang F, Yang Z, Li Y, Xu Q, Lan H, Cyganek L, El-Battrawy I, Zhou X, Akin I, Borggreffe M.  
488 Epigenetic mechanism of I-type calcium channel beta-subunit downregulation in short QT human  
489 induced pluripotent stem cell-derived cardiomyocytes with *cacnb2* mutation. *Europace :  
490 European pacing, arrhythmias, and cardiac electrophysiology : journal of the working groups on  
491 cardiac pacing, arrhythmias, and cardiac cellular electrophysiology of the European Society of  
492 Cardiology*. 2022;24:2028-2036
- 493 26. Zhong R, Schimanski T, Zhang F, Lan H, Hohn A, Xu Q, Huang M, Liao Z, Qiao L, Yang Z, Li Y, Zhao  
494 Z, Li X, Rose L, Albers S, Maywald L, Muller J, Dinkel H, Saguner A, Janssen JWG, Swamy N, Xi Y,  
495 Lang S, Kleinsorge M, Duru F, Zhou X, Diecke S, Cyganek L, Akin I, El-Battrawy I. A preclinical  
496 study on brugada syndrome with a *cacnb2* variant using human cardiomyocytes from induced  
497 pluripotent stem cells. *International journal of molecular sciences*. 2022;23
- 498 27. Delfin DA, Xu Y, Schill KE, Mays TA, Canan BD, Zang KE, Barnum JA, Janssen PM, Rafael-Fortney  
499 JA. Sustaining cardiac claudin-5 levels prevents functional hallmarks of cardiomyopathy in a  
500 muscular dystrophy mouse model. *Molecular therapy : the journal of the American Society of  
501 Gene Therapy*. 2012;20:1378-1383
- 502 28. Sebastien M, Giannesini B, Aubin P, Brocard J, Chivet M, Pietrangelo L, Boncompagni S, Bosc C,  
503 Brocard J, Rendu J, Gory-Faure S, Andrieux A, Fourest-Lieuvain A, Faure J, Marty I. Deletion of the  
504 microtubule-associated protein 6 (*map6*) results in skeletal muscle dysfunction. *Skeletal muscle*.  
505 2018;8:30
- 506 29. Yin K, Ma Y, Cui H, Sun Y, Han B, Liu X, Zhao K, Li W, Wang J, Wang H, Wang S, Zhou Z. The co-  
507 segregation of the *myl2* r58q mutation in chinese hypertrophic cardiomyopathy family and its  
508 pathological effect on cardiomyopathy disarray. *Molecular genetics and genomics : MGG*.  
509 2019;294:1241-1249
- 510 30. Richard P, Charron P, Carrier L, Ledeuil C, Cheav T, Pichereau C, Benaiche A, Isnard R, Dubourg O,  
511 Burban M, Gueffet JP, Millaire A, Desnos M, Schwartz K, Hainque B, Komajda M, Project EHF.  
512 Hypertrophic cardiomyopathy: Distribution of disease genes, spectrum of mutations, and  
513 implications for a molecular diagnosis strategy. *Circulation*. 2003;107:2227-2232
- 514 31. Jiang S, Liu S, Hou Y, Lu C, Yang W, Ji T, Yang Y, Yu Z, Jin Z. Cardiac-specific overexpression of  
515 claudin-5 exerts protection against myocardial ischemia and reperfusion injury. *Biochimica et  
516 biophysica acta. Molecular basis of disease*. 2022;1868:166535

517

518

519 **Figure legends**

520 **Fig. 1 Myocardial dilation, myocyte atrophy and Cldn5 reduction in the left atrial**

521 **appendages of AF patients** (A) Exemplar images of electrocardiogram (ECG) and apical four-  
522 chamber view of the heart in AF patient and control. Red box indicates left atrium (LA). (B) Left  
523 appendages of the LA was excised during the modified radiofrequency ablation maze procedure  
524 indicated in the right panel. Left panel indicates the traditional percutaneous radiofrequency  
525 ablation for AF. (C) Representative western blot of Cldn5 in left appendages of AF patients.  
526 Human lung tissue is used as positive control. (D) Exemplar left atrial appendage section stained  
527 with anti-Cldn5, CD31 and TOMM20 antibodies. Anti-Cldn5 primary antibody is Alexa Fluor  
528 488 conjugated (Green) while CD31 and TOMM20 antibodies is visualized by Fluorescein  
529 donkey anti-rabbit IgG Alexa Fluor 594 (Red). DAPI is used to stain nucleus. Scale bar, 20  $\mu$ m.  
530 (E) Quantification of immunofluorescent staining of Cldn5 in cardiomyocytes. (F) Exemplar left  
531 atrial appendage section stained with WGA for assessing cardiomyocyte's cross section. Scale  
532 bar, 20  $\mu$ m. (G) Quantification of cross-section of cardiomyocytes. \*  $P < 0.05$  vs. Non-AF; n =  
533 5.

534 **Fig. 2 Reduced Cldn5 expression, cardiac atrophy and arrhythmia in mouse heart.** (A)

535 Cldn5 shRNA adeno-associated virus (AAV) was injected in three points in the myocardium of  
536 the left ventricle (LV). (B) Western blot of claudin-5 in injected area 4 weeks later. Murine lung  
537 tissue is used as a positive control. (C) Quantitative analysis of the protein level of claudin-5 in  
538 LV myocardium after AAV infection. AAV NC indicates control AAV. \*  $P < 0.05$  vs. AAC NC;  
539 n = 5. (D) Exemplar views of the long axis of LV under echocardiographic observation. A red  
540 box indicates the thickness of the LV anterior wall at diastole (LVAWd). (E) Quantitative  
541 analysis of the LVAWd. \*  $P < 0.05$  vs. AAC NC; n = 5. (F) Exemplar images of  
542 electrocardiogram (ECG) in mice after 4 weeks of Cldn5 AAV infection in LV myocardium. 30%  
543 of mice developed ST elevation; 40% of mice developed AF and 40% of mice developed  
544 absence of P-waves prior to QRS. N=10 in each group. (G) The cross-section of cardiomyocytes  
545 is stained with WGA after AAV infection for 4 weeks. Scale bar, 20  $\mu$ m. (H) Quantification of  
546 the cross-section of cardiomyocytes. \*  $P < 0.05$  vs. AAV NC; n = 5.

547 **Fig. 3 Tandem mass tag (TMT)-based quantitative proteomic sequencing results.**

548 (A) Summary of tandem mass spectrometry database search analysis. (B) The relative standard

549 deviation (RSD) of the samples. (C) Statistical analysis of differentially expressed proteins  
550 (DEPs). (D) A heatmap with hierarchical clustering of DEPs. (E) The distribution of the  
551 molecular size of the identified proteins.

552 **Fig. 4 INGENUITY pathway analysis (IPA) results.** (A) Bubble chart of metabolic pathway  
553 and signal pathway associated with differentially expressed proteins (DEPs). Cardiovascular  
554 signaling is marked by the red font. (B) Bubble chart of cardiovascular signaling. (C) Venn  
555 diagram demonstrating the number of quantified proteins from the cardiac hypertrophy signaling.

556 **Fig. 5 AF patients' left atrial appendages proteomics exhibits a distinct profile for**  
557 **abnormal heart ventricles.** (A) Cardiovascular disease analysis of DAPs. (B) Diagram  
558 indicating the transition from hypertrophic cardiomyopathy to dilated cardiomyopathy. (C)  
559 Volcano plot of DEPs. Red dots indicate significantly up-regulated proteins, blue dots indicate  
560 significant down-regulated proteins and gray dots indicate proteins without differences. Among  
561 blue dots, CACNA2D2, CACNB2, MYL2 and MAP6 were highly associated with hypertrophic  
562 cardiomyopathy or dilated cardiomyopathy. (D and E) KEGG enrichment analysis of DEPs  
563 indicating CACNA2D2, CACNB2, MYL2 and MAP6 were functioned as calcium transport and  
564 myofibril assembly. And down-regulation of these proteins will lead to dilated cardiomyopathy.

565 **Fig. 6 Cldn5 knockdown on dilated cardiomyopathy pathway *in vivo*.** (A and B) The western  
566 blot and quantitative analysis of the Cldn5, CACNA2D2, CACNB2, MYL2 and MAP6 in AF  
567 and non-AF left atrial appendages. (C) Representative immunogold-Cldn5 and mitochondrial  
568 morphology images were observed under transmission electron microscopy (TEM). Scale  
569 bar=1 $\mu$ m. (D) Quantitative analysis of immunogold-Cldn5. (E and F) The western blot and  
570 quantitative analysis of the Cldn5, CACNA2D2, CACNB2, MYL2 and MAP6 in the left  
571 ventricles of Cldn5 shRNA AAV and AAV NC injected mice. (G) Representative images of  
572 mitochondrial morphology under TEM. Scale bar=1 $\mu$ m. (H) Quantitative analysis of  
573 mitochondrial number in different groups. \* $P < 0.05$  vs. AAV NC; n = 5 in each group.

574 **Fig. 7 Cldn5 knockdown on the mitochondrial number and membrane potential *in vitro*.** (A  
575 and B) The western blot and quantitative analysis of the Cldn5, CACNA2D2, CACNB2, MYL2  
576 and MAP6 in HL-1 cells after si-Cldn5 transfection for 48 hours. Si-NC is used as the control  
577 siRNA. (C) Representative images of mitochondria in HL-1 cells stained with Mitotracker Green.

578 DAPI is used to stain the nucleus. (D) Quantitative analysis of Mitotracker fluorescence intensity.  
579 Scale bar=100  $\mu$ m. (E) Mitochondrial membrane potential was analyzed by JC-1 staining. Scale  
580 bar=100  $\mu$ m. (F) Quantitative analysis of the fluorescence intensity ratio between the red  
581 aggregates and green monomer fluorescence. \*  $P < 0.05$  vs. Si-NC; n = 5 in each group.

582 **Fig. 8 Diagram of claudin-5-mediated signaling.**

583 Cldn5 deficiency decreases the expression of CACNA2D2 and CACNB2, leading to calcium  
584 transport disturbance. Mitochondrial membrane and membrane potential were decreased after  
585 Cldn5 knockdown. Cldn5 deficiency also decreases the expression of MYL2 and MAP6 which  
586 are responsible for the disturbance of myofibril assembly and microtubule stabilization. All these  
587 effects lead to myocardial excitation-contraction coupling disorder followed by cardiac myocyte  
588 atrophy and atrial fibrillation.

589

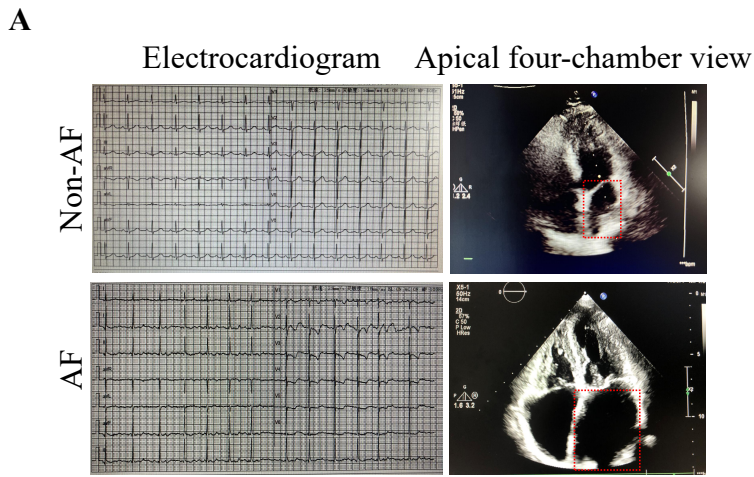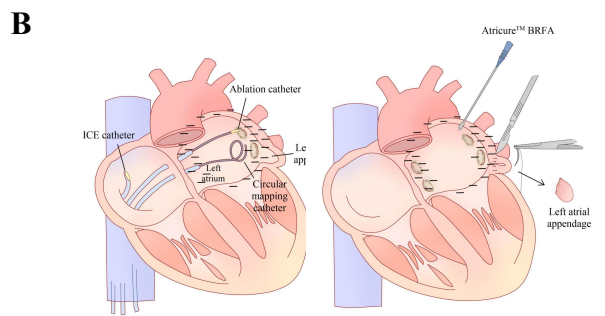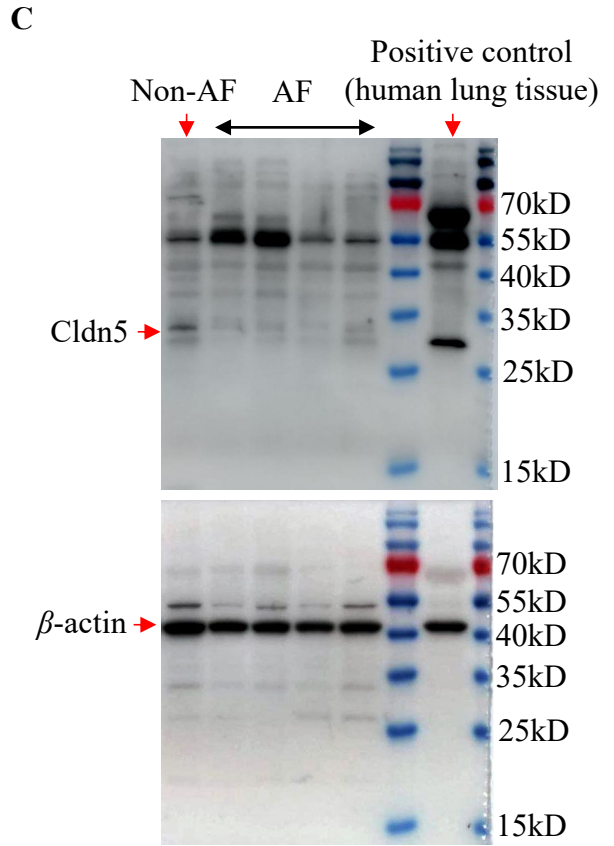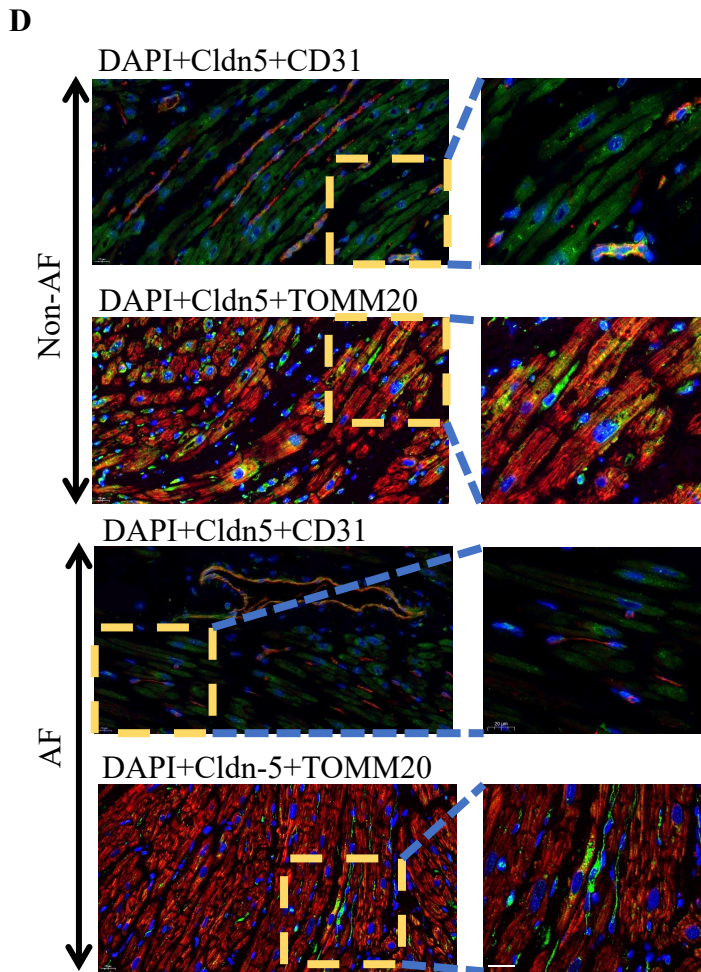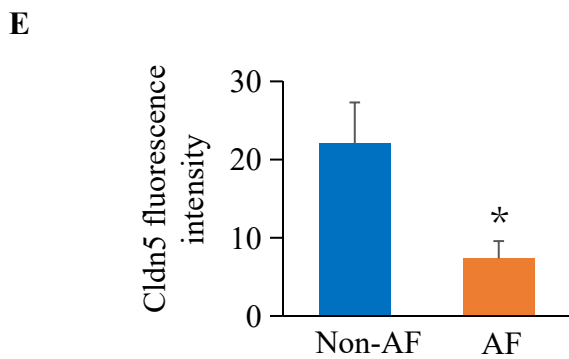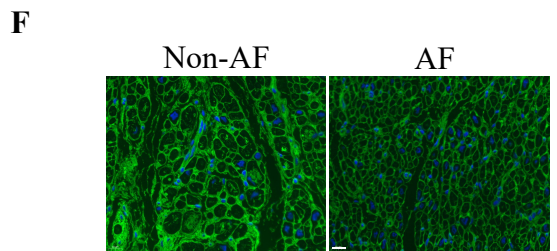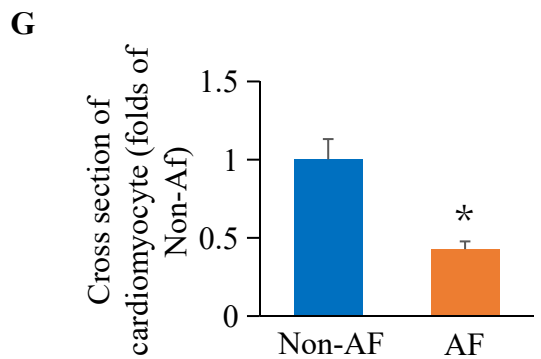

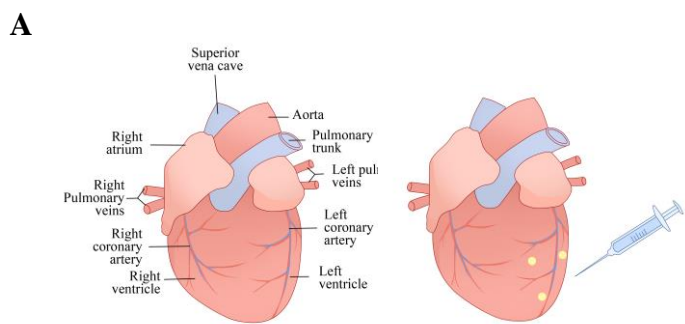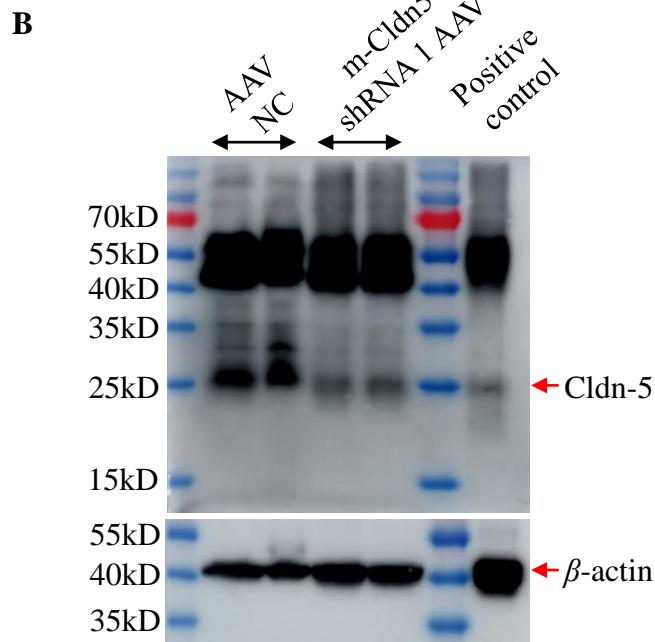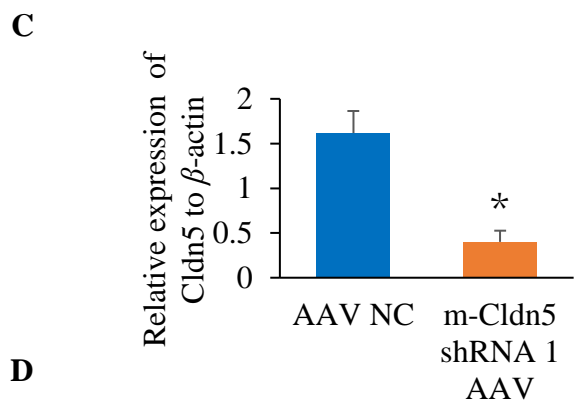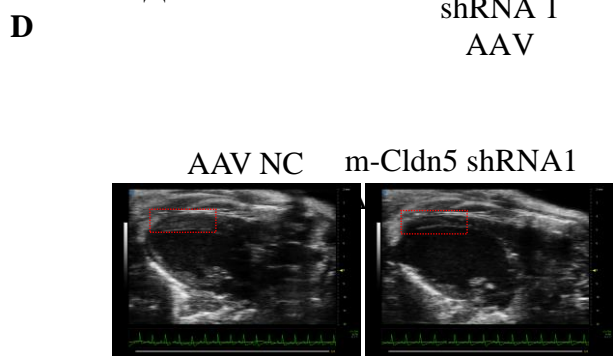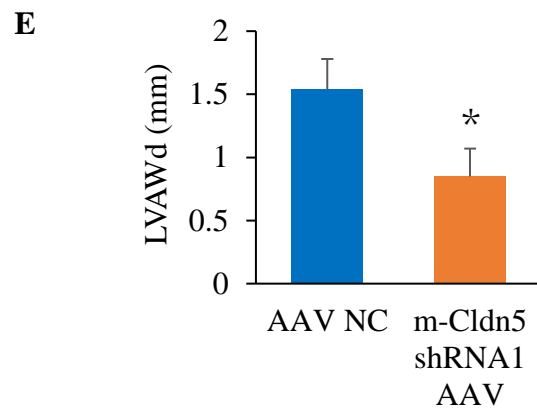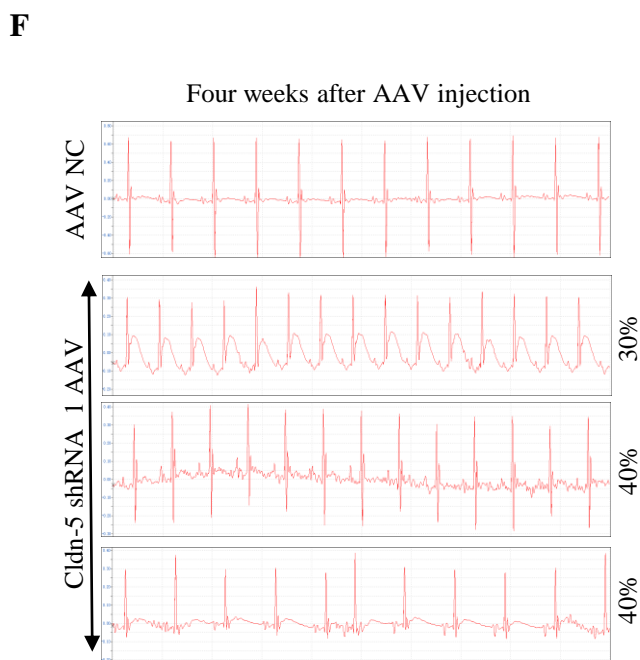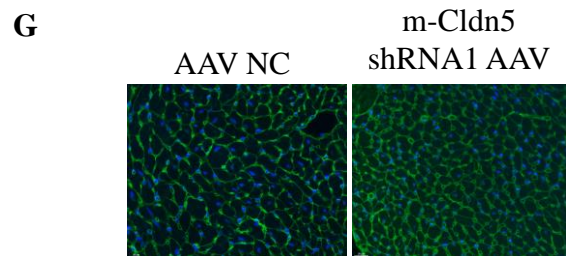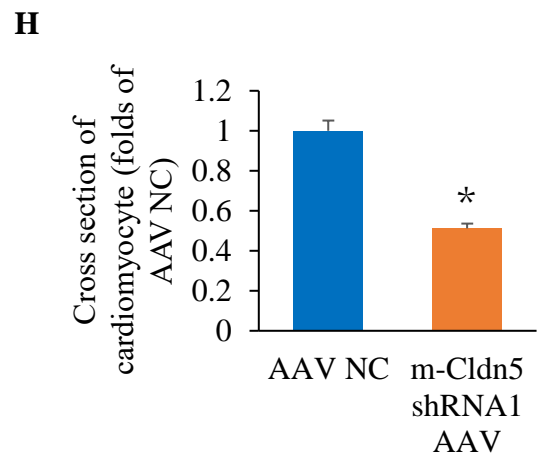

A

medRxiv preprint doi: <https://doi.org/10.1101/2023.07.11.23292531>; this version posted July 13, 2023. The copyright holder for this preprint (which was not certified by peer review) is the author/funder, who has granted medRxiv a license to display the preprint in perpetuity. All rights reserved. No reuse allowed without permission.

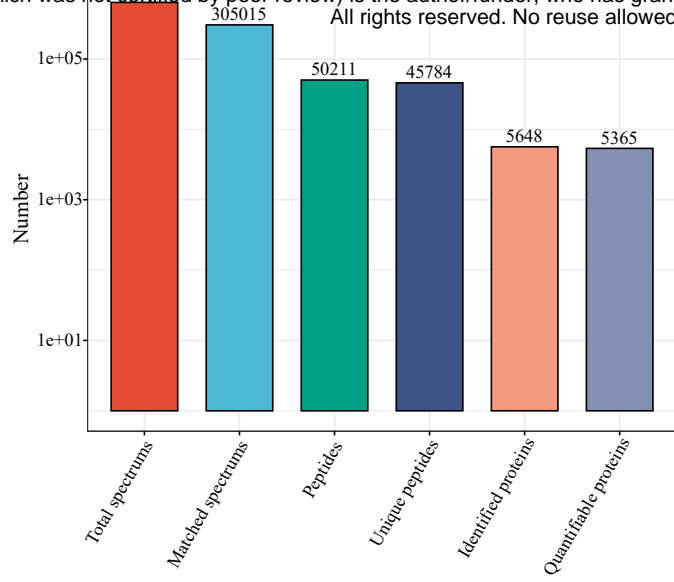

D

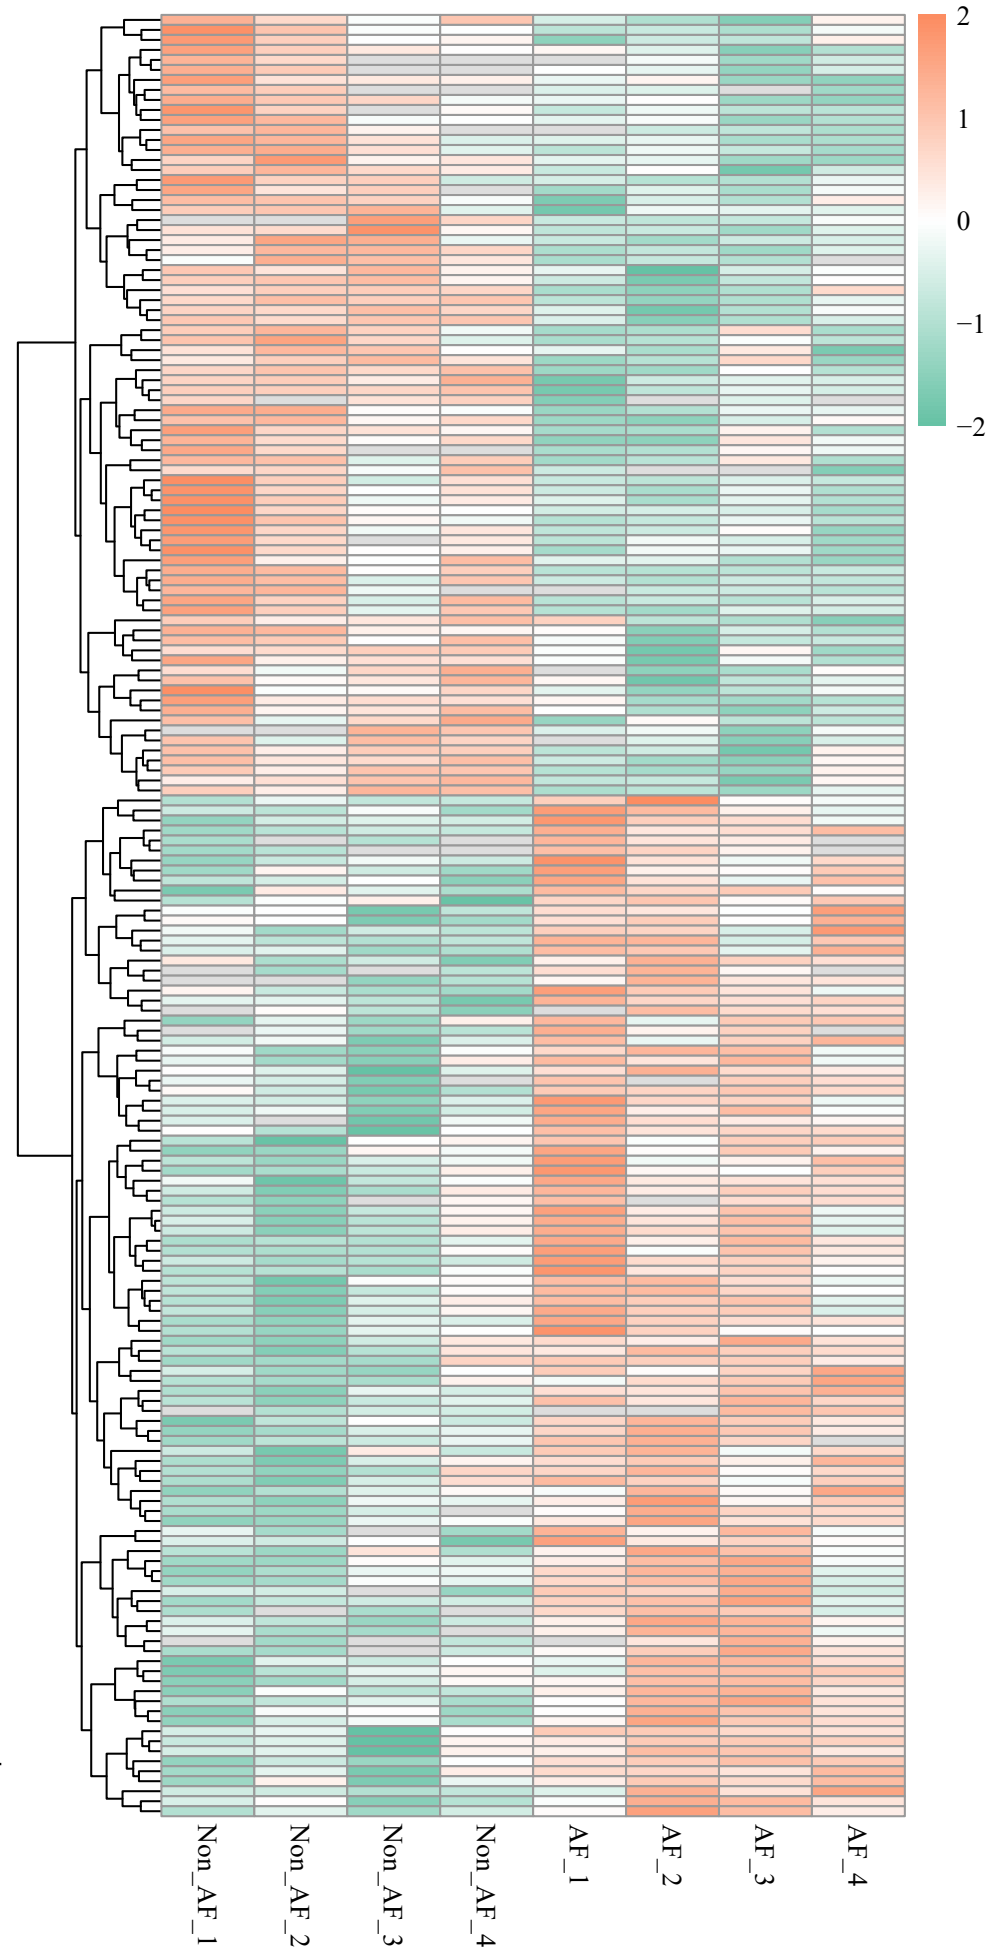

B

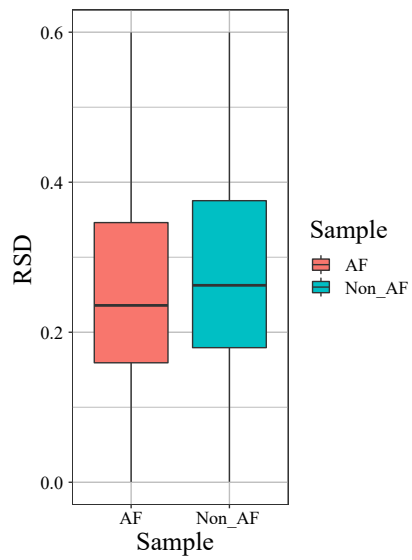

C

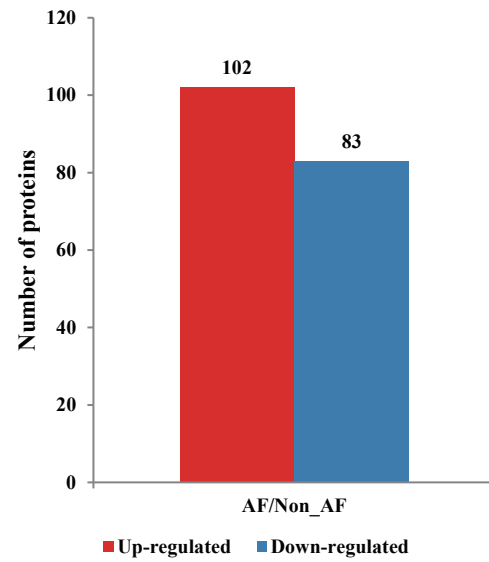

E

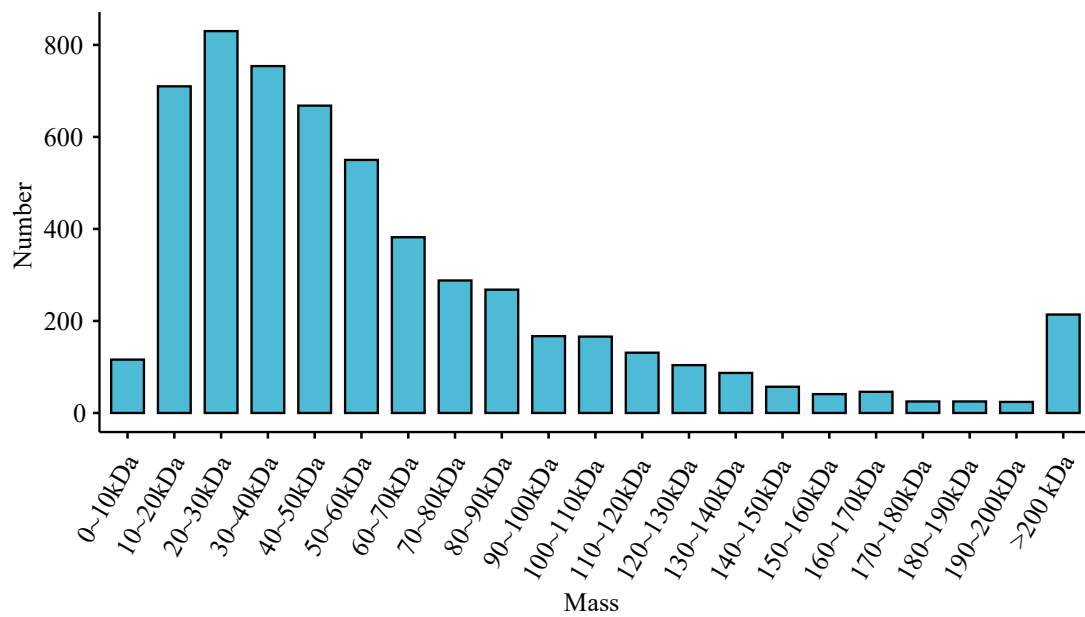



A

medRxiv preprint doi: <https://doi.org/10.1101/2023.07.11.23292531>; this version posted July 13, 2023. The copyright holder for this preprint (which was not certified by peer review) is the author/funder, who has granted medRxiv a license to display the preprint in perpetuity. All rights reserved. No reuse allowed without permission.

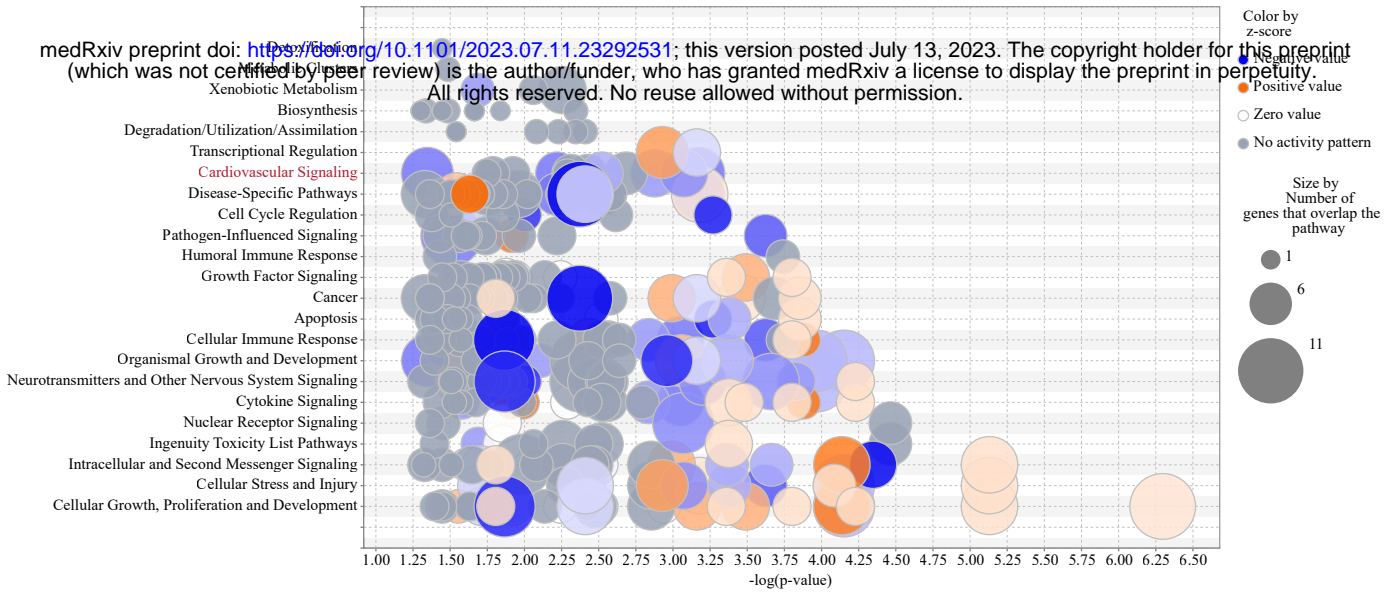

B

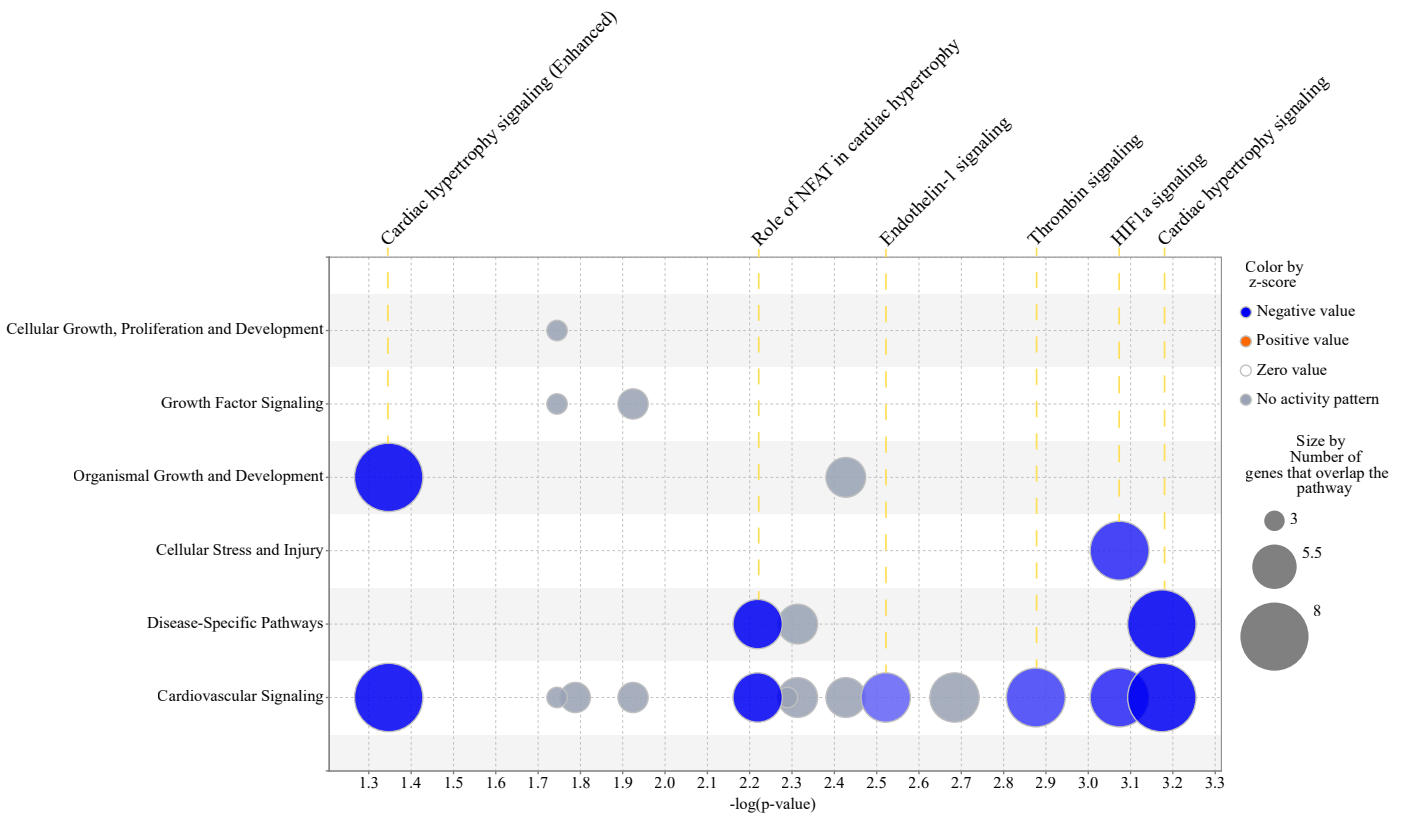

C

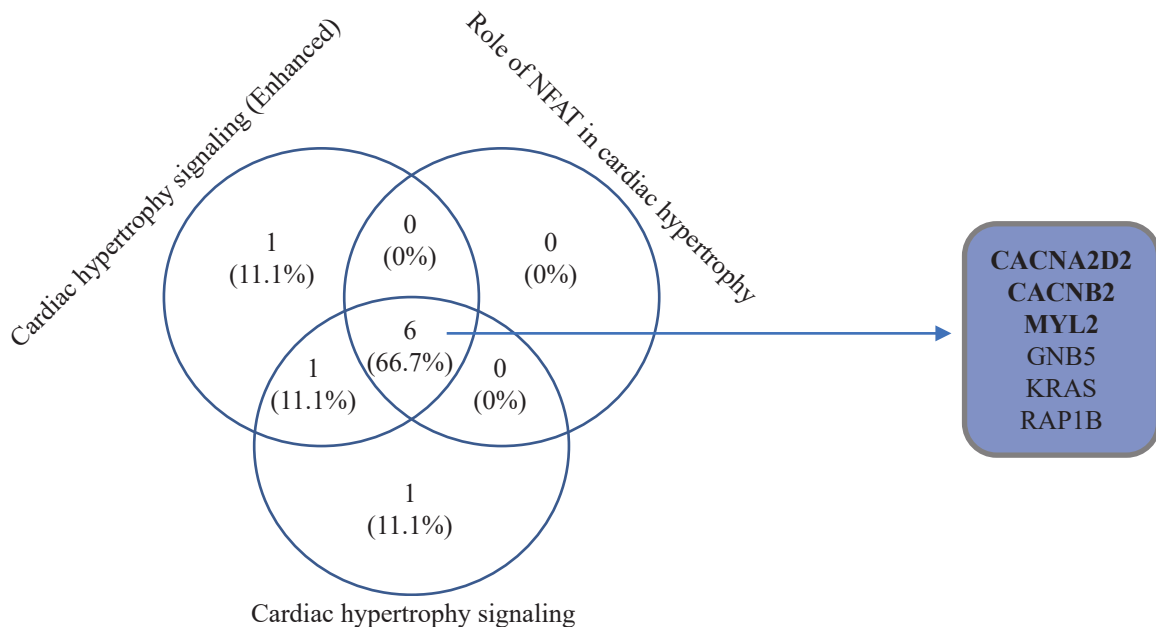

**A**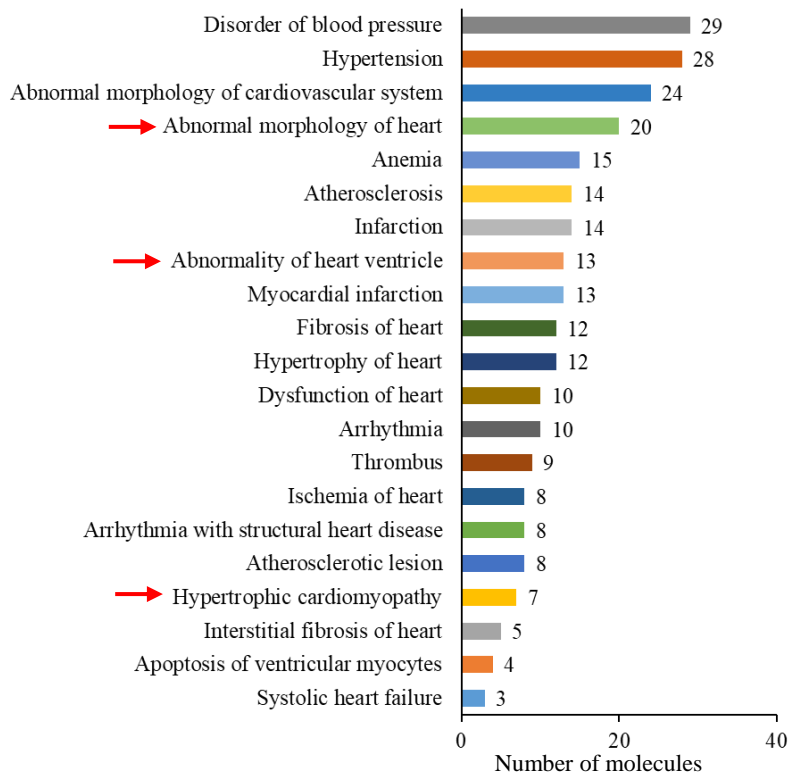**B**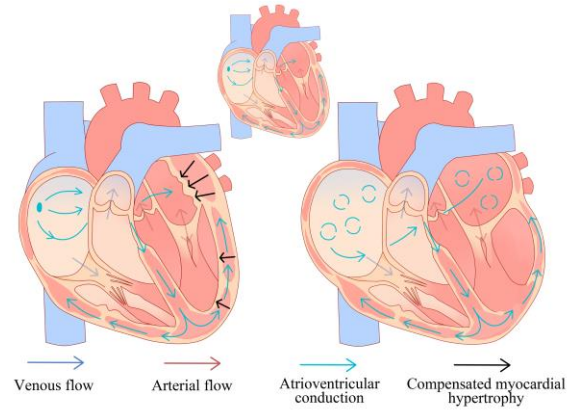**C**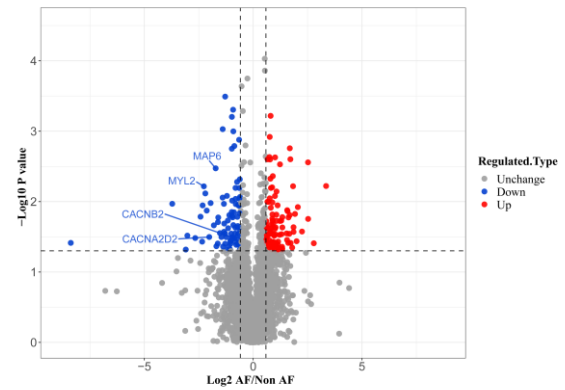**D**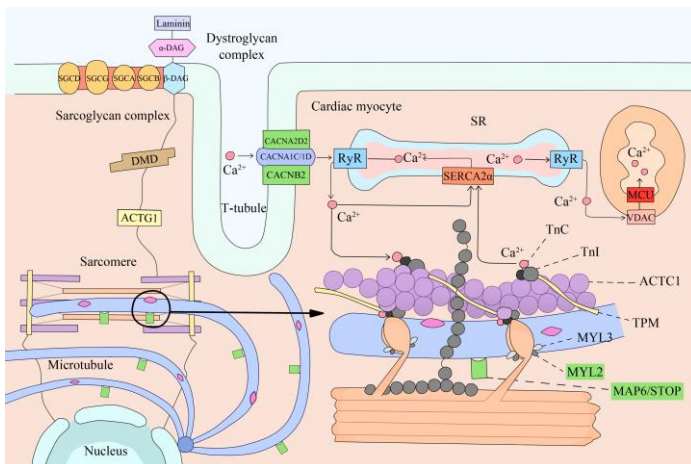**E**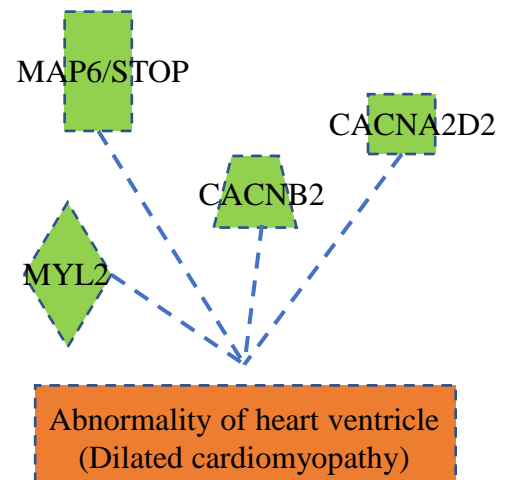

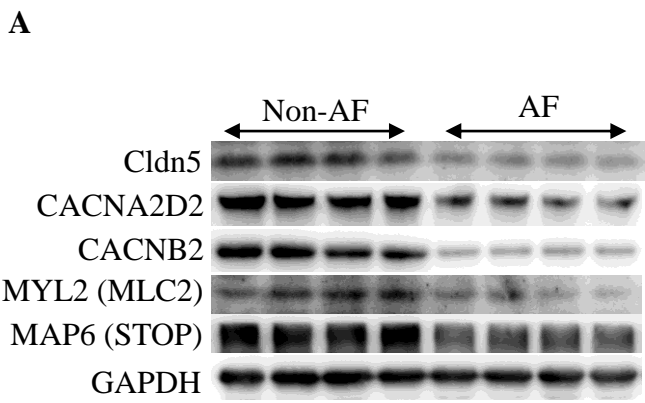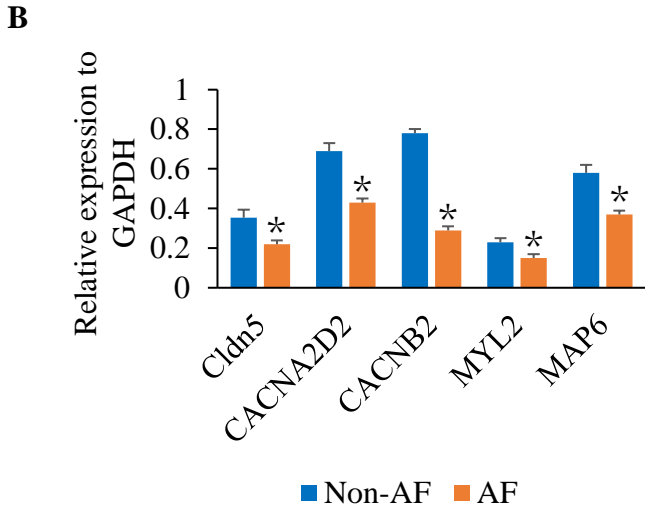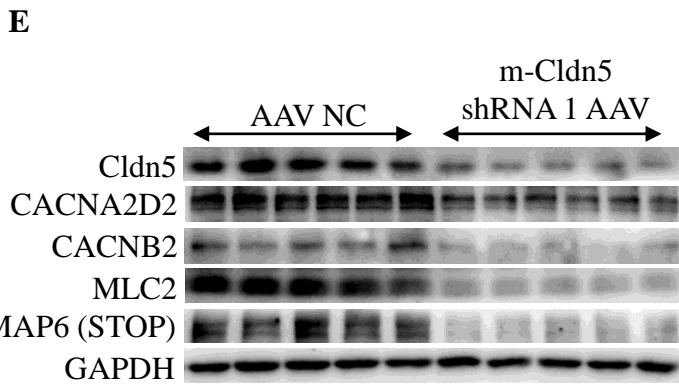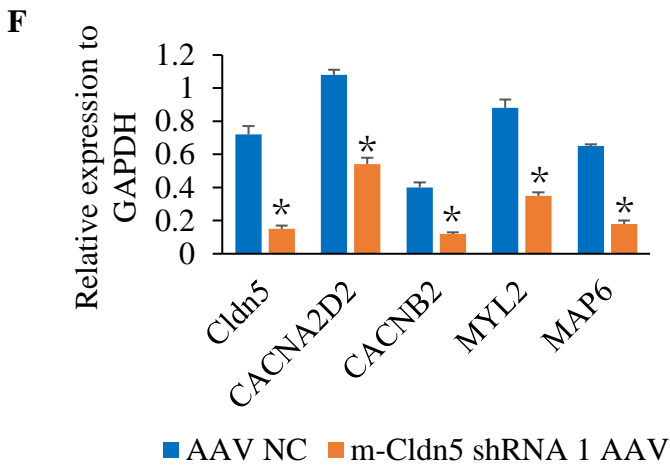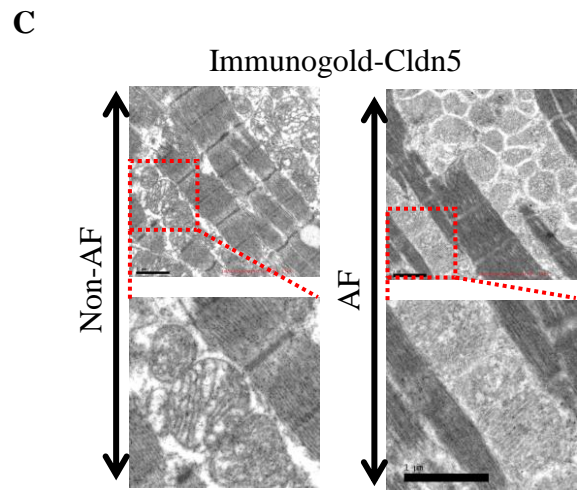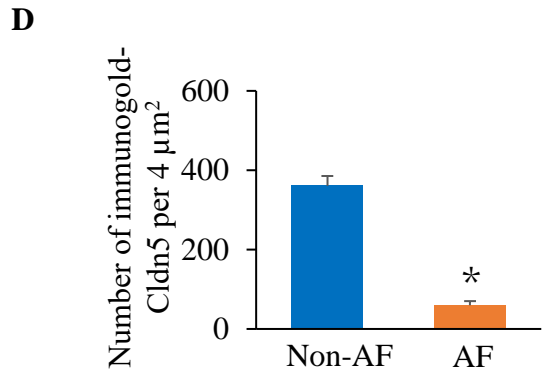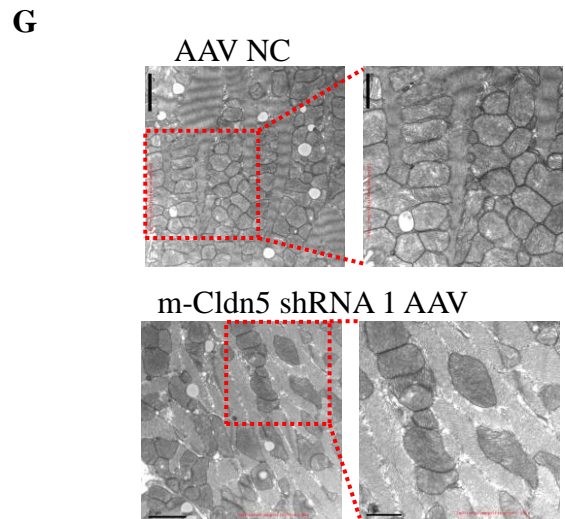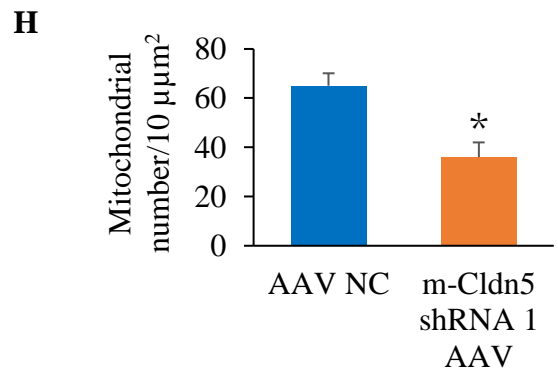

A

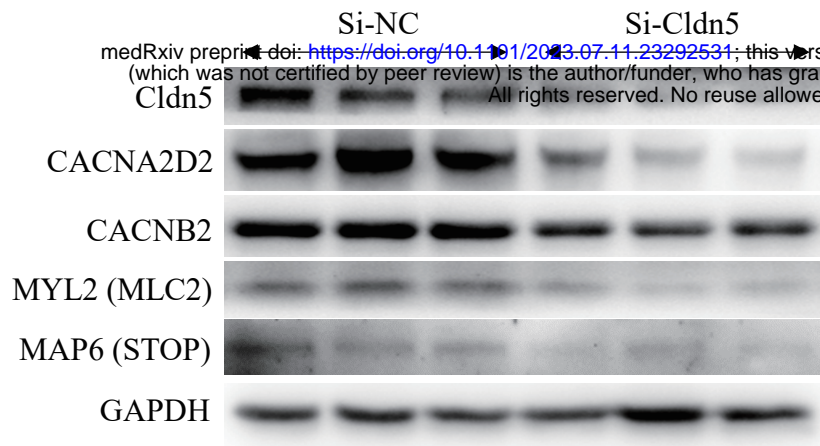

B

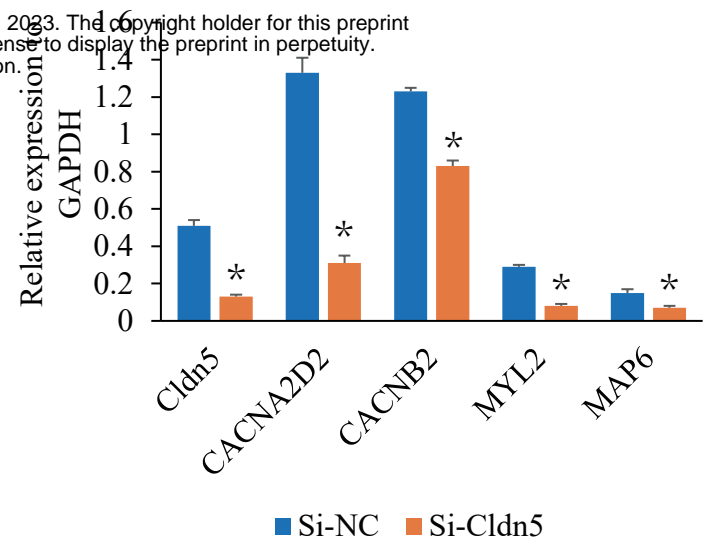

C

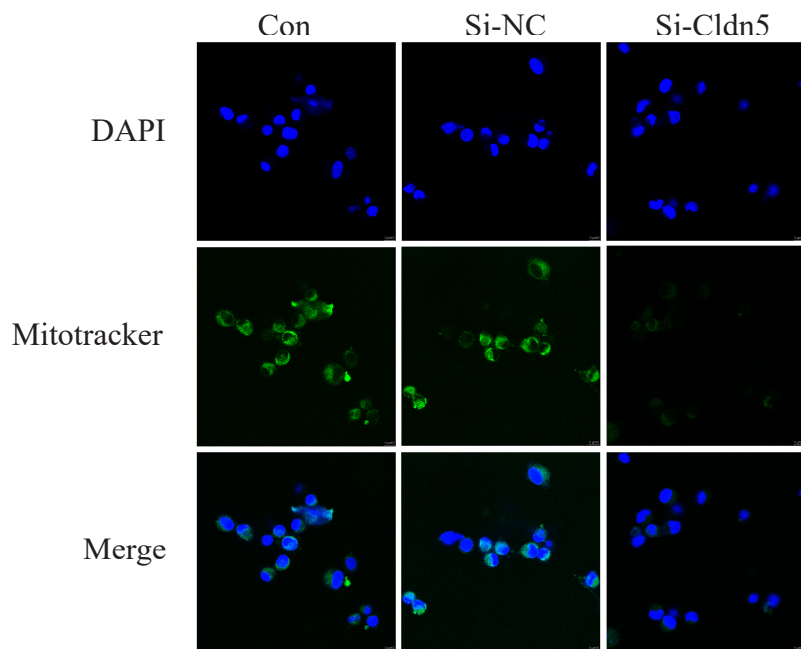

D

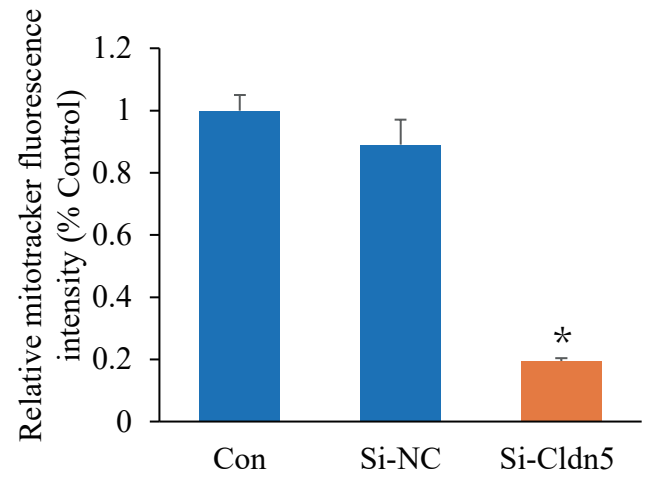

E

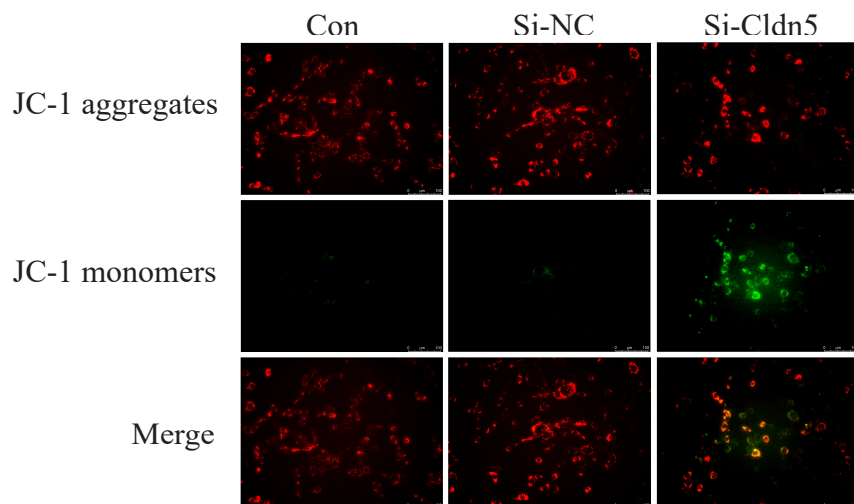

F

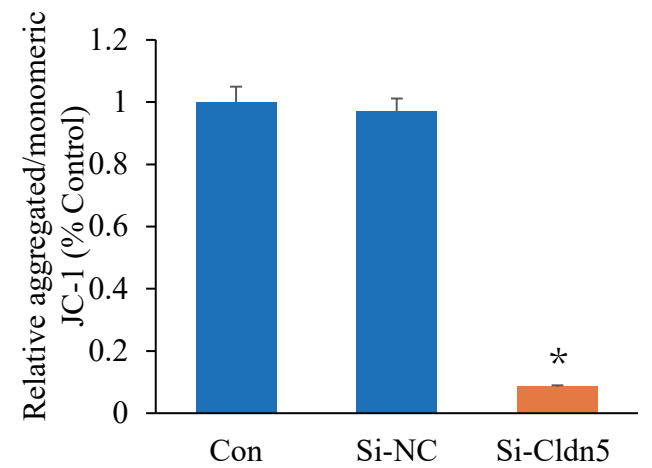

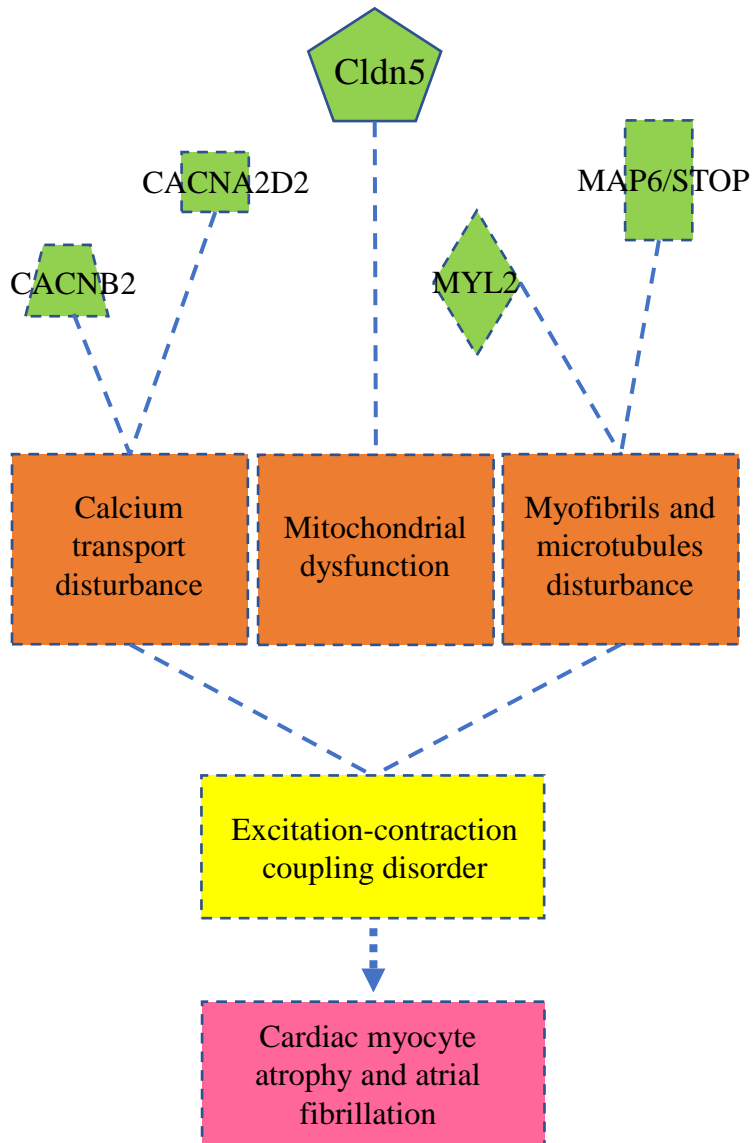

Source: https://www.medrxiv.org/content/10.1101/2023.07.11.23292531v1.full.pdf
